# Supplementary material for: Triflic acid-mediated synthesis of thioglycosides
Source: Royal Society of Chemistry journal article supplement (doi:10.1039/c9ob01610d), 2019-01-01
Supplement: c9ob01610d1.pdf [file c9ob01610d1.pdf]

## Supporting information

# Triflic Acid-Mediated Synthesis of Thioglycosides

Samira Escopy, Yashapal Singh, and Alexei V. Demchenko\*

*Department of Chemistry and Biochemistry, University of Missouri – St. Louis,  
One University Boulevard, St. Louis, MO 63121, USA; e-mail: [demchenkoa@umsl.edu](mailto:demchenkoa@umsl.edu)*

## Contents:

|                             |    |
|-----------------------------|----|
| General experimental        | S1 |
| Synthesis of thioglycosides | S1 |
| References                  | S7 |
| NMR spectra                 | S9 |

## General Experimental

The reactions were performed using commercial reagents. Column chromatography was performed on silica gel 60 (70-230 mesh), reactions were monitored by TLC on Kieselgel 60 F254. The compounds were detected by examination under UV light and by charring with 10% sulfuric acid in methanol. Solvents were removed under reduced pressure at <40 °C. CH<sub>2</sub>Cl<sub>2</sub> was distilled from CaH<sub>2</sub> directly prior to application. Molecular sieves (3 Å), used for reactions, were crushed and activated *in vacuo* at 390 °C during 8 h in the first instance and then for 2-3 h at 390 °C directly prior to application. <sup>1</sup>H-NMR spectra were recorded in CDCl<sub>3</sub> at 300 MHz.

## Synthesis of Thioglycosides

### Ethyl 2,3,4,6-tetra-*O*-acetyl-1-thio-β-D-glucopyranoside (**2**).

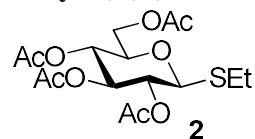

A mixture of per-acetate **1** (0.43 g, 1.10 mmol), ethanethiol (0.16 mL, 2.20 mmol), and freshly activated molecular sieves (3 Å, 0.21 g) in anhydrous CH<sub>2</sub>Cl<sub>2</sub> (34 mL) was stirred under argon for 15 min at rt. The mixture was cooled to 0 °C, TfOH (78.2 μL, 0.88 mmol) was added dropwise, and the resulting mixture was stirred for 1 h at 0 °C. After that, the solids were filtered off through a pad of Celite and washed successively with CH<sub>2</sub>Cl<sub>2</sub>. The combined filtrate (~200 mL) was washed with sat. aq. NaHCO<sub>3</sub> (70 mL) and water (3 × 70 mL). The organic phase was separated, dried with MgSO<sub>4</sub>, and concentrated *in vacuo*. Crystallization (Et<sub>2</sub>O-hexanes) for 16 h at 4 °C afforded the title compound (0.39 g, 90%) as a white crystalline solid. The analytical data for **2** was in agreement with that reported previously.<sup>1,2</sup>

A large-scale synthesis of **2**. A mixture of per-acetate **1** (15.0 g, 38.4 mmol), ethanethiol (5.55 mL, 76.8 mmol), and freshly activated molecular sieves (3 Å, 2.25 g) in anhydrous CH<sub>2</sub>Cl<sub>2</sub> (300

mL) was stirred under argon for 15 min at rt. The mixture was cooled to 0 °C, TfOH (2.72 mL, 30.7 mmol) was added dropwise, and the resulting mixture was stirred for 30 min at 0 °C. After that, the solids were filtered off through a pad of Celite and washed successively with CH<sub>2</sub>Cl<sub>2</sub>. The combined filtrate (~500 mL) was washed with sat. aq. NaHCO<sub>3</sub> (100 mL) and water (3 × 100 mL). The organic phase was separated, dried with MgSO<sub>4</sub>, and concentrated in *vacuo*. Crystallization (Et<sub>2</sub>O-hexane) for 16 h at 4 °C afforded the title compound (13.2 g, 87%) as a white solid.

The analytical data for **2** was in agreement with that reported previously.<sup>1,2</sup> Spectral data for **2**: <sup>1</sup>H NMR (CDCl<sub>3</sub>): δ, 1.25 (t, 3H, CH<sub>2</sub>CH<sub>3</sub>), 2.01, 2.03, 2.06, 2.08 (4 s, 12H, 4 × COCH<sub>3</sub>), 2.69–2.75 (m, 2H, CH<sub>2</sub>CH<sub>3</sub>), 3.69–3.75 (m, 1H, *J*<sub>5,6a</sub> = 5.0 Hz, H-5), 4.15 (dd, 1H, *J*<sub>6a,6b</sub> = 12.3 Hz, H-6a), 4.22 (dd, 1H, H-6b), 4.46 (d, 1H, *J*<sub>1,2</sub> = 10.0 Hz, H-1), 5.04 (dd, 1H, *J*<sub>2,3</sub> = 9.9 Hz, H-2), 5.09 (dd, 1H, *J*<sub>4,5</sub> = 9.6 Hz, H-4), 5.20 (dd, 1H, *J*<sub>3,4</sub> = 8.9 Hz, H-3) ppm; <sup>13</sup>C-NMR (CDCl<sub>3</sub>): δ, 14.8, 20.6, 20.7, 20.8, 24.2, 62.1, 68.2, 69.7, 73.8, 75.8, 76.6, 83.5, 169.4, 169.5, 170.2, 170.7 ppm.

**Ethyl 2,3,4,6-tetra-*O*-acetyl-1-thio-β-D-galactopyranoside (4).**

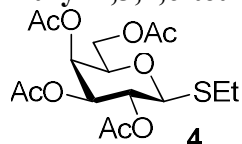

The title compound was synthesized as described for the synthesis of **2**. The analytical data for **4** was in agreement with that reported previously.<sup>3,4</sup> Spectral data for **4**: <sup>1</sup>H NMR (CDCl<sub>3</sub>): δ, 1.25 (t, 3H, CH<sub>2</sub>CH<sub>3</sub>), 1.98, 2.03, 2.05, 2.13 (4 s, 12H, 4 × COCH<sub>3</sub>), 2.73 (m, 2H, CH<sub>2</sub>CH<sub>3</sub>), 3.89 (dt, 1H, *J*<sub>5,6</sub> = 6.6 Hz, H-5), 4.12 (m, 2H, H-6a, 6b), 4.8 (d, 1H, *J*<sub>1,2</sub> = 9.9 Hz, H-1), 4.98 (dd, 1H, *J*<sub>3,4</sub> = 3.3 Hz, H-3), 5.23 (dd, 1H, *J*<sub>2,3</sub> = 10.0 Hz, H-2), 5.42 (dd, 1H, *J*<sub>4,5</sub> = 1.0 Hz, H-4) ppm; <sup>13</sup>C NMR (CDCl<sub>3</sub>): δ 14.8, 20.6, 20.7, 20.8, 24.4, 61.3, 67.0, 67.1, 71.8, 74.3, 84.0, 169.4, 169.6, 170.1, 170.2, 170.4 ppm.

**Ethyl 2,3,4,6-tetra-*O*-acetyl-1-thio-α-D-mannopyranoside (6).**

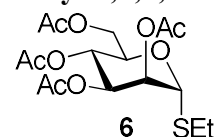

The title compound was synthesized as described for the synthesis of **2**. The analytical data for **6** was in agreement with that reported previously.<sup>4,5</sup> Spectral data for **6**: <sup>1</sup>H NMR (CDCl<sub>3</sub>): δ, 1.30 (t, 3H, CH<sub>2</sub>CH<sub>3</sub>), 1.99, 2.03, 2.04, 2.11 (4 s, 12H, 4 × COCH<sub>3</sub>), 2.59–2.72 (m, 2H, CH<sub>2</sub>CH<sub>3</sub>), 4.09 (dd, 1H), 4.31 (dd, 1H), 4.49 (m, 1H), 5.24–5.37 (m, 4H) ppm; <sup>13</sup>C NMR (CDCl<sub>3</sub>): δ, 14.8, 20.6, 20.7, 20.8, 25.4, 62.3, 66.3, 68.8, 69.4, 71.1, 76.6, 82.8, 169.7, 169.8, 170.0, 170.6 ppm.

**Ethyl 3,4,6-tri-*O*-acetyl-2-deoxy-2-phthalimido-1-thio-β-D-glucopyranoside (8).**

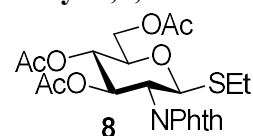

The title compound was synthesized as described for the synthesis of **2**. The analytical data for **8** was in agreement with that reported previously.<sup>6,7</sup> Spectral data for **8**: <sup>1</sup>H NMR (CDCl<sub>3</sub>): δ, 1.22 (t, 3H, CH<sub>2</sub>CH<sub>3</sub>), 1.87, 2.04, 2.11 (3 s, 9H, 3 × COCH<sub>3</sub>), 2.72 (m, 2H, CH<sub>2</sub>CH<sub>3</sub>), 3.90 (m, 1H, H-

5), 4.18 (dd, 1H, H-6a), 4.28-4.44 (m, 2H, H-2, 6b), 5.20 (dd, 1H, H-4), 5.50 (d, 1H,  $J_{1,2} = 10.6$  Hz, H-1), 5.85 (dd, 1H, H-2), 7.74 – 7.90 (m, 4H, aromatic) ppm;  $^{13}\text{C}$  NMR ( $\text{CDCl}_3$ ):  $\delta$  14.8, 20.4, 20.6, 20.8, 24.3, 53.6, 62.2, 68.8, 71.5, 75.8, 81.1, 123.74, 131.1, 131.5, 134.3, 134.4, 167.1, 167.8, 169.5, 170.1, 170.7 ppm.

**Methyl (ethyl 5-acetamido-4,7,8,9-tetra-*O*-acetyl-3,5-dideoxy-2-thio-D-glycero-D-galactonon-2-ulopyranosid)onate (10).**

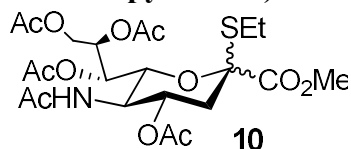

The title compound was synthesized as described for the synthesis of **2**. The analytical data for **10** was in agreement with that reported previously.<sup>8,9</sup> Selected spectral data for **10**:  $^1\text{H}$  NMR ( $\text{CDCl}_3$ ):  $\delta$ , 2.70 (dd,  $J_{3\text{eq},3\text{ax}} = 12.3$  Hz, H-3eq <sup>$\alpha$</sup> ), 2.57 (dd,  $J_{3\text{eq},3\text{ax}} = 13.1$  Hz, H-3eq <sup>$\beta$</sup> ) ppm.

**Ethyl *O*-(2,3,4,6-tetra-*O*-acetyl- $\beta$ -D-galactopyranosyl)-(1 $\rightarrow$ 4)-2,3,6-tri-*O*-acetyl-1-thio- $\beta$ -D-glucopyranoside (12).**

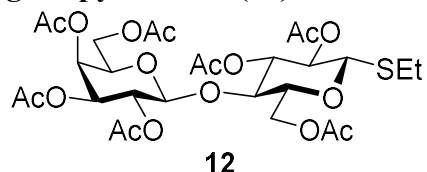

The title compound was synthesized as described for the synthesis of **2**. The analytical data for **12** was in agreement with that reported previously.<sup>10</sup> Spectral data for **12**:  $^1\text{H}$  NMR ( $\text{CDCl}_3$ ):  $\delta$ , 1.25 (t, 3H,  $\text{CH}_2\text{CH}_3$ ), 1.96-2.16 (7 s, 21H,  $7 \times \text{COCH}_3$ ), 2.68 (m, 2H,  $\text{CH}_2\text{CH}_3$ ), 3.62 (m, 1H, H-5), 3.80 (dd, 1H, H-4), 3.87 (m, 1H, H-5'), 4.05-4.16 (m, 3H), 4.44-4.51 (m, 3H), 4.90-4.98 (dt, 2H, H-3, 3'), 5.11 (dd, 1H, H-2'), 5.22 (dd, 1H, H-2), 5.35 (dd, 1H, H-4') ppm;  $^{13}\text{C}$  NMR ( $\text{CDCl}_3$ ):  $\delta$ , 14.8, 20.5, 20.6 ( $\times 2$ ), 20.7, 20.8, 22.6, 24.2, 60.7, 62.2, 66.5, 69.0, 70.2, 70.6, 70.9, 71.4, 73.7, 76.2, 76.6, 83.4, 101.0, 168.9, 169.0, 169.7 ( $\times 2$ ), 170.0, 170.1, 170.6 ppm.

**Phenyl 2,3,4,6-tetra-*O*-acetyl-1-thio- $\beta$ -D-glucopyranoside (13).**

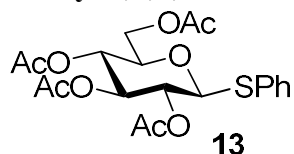

The title compound was synthesized as described for the synthesis of **2**. The analytical data for **13** was in agreement with that reported previously.<sup>1</sup> Spectral data for **13**:  $^1\text{H}$  NMR ( $\text{CDCl}_3$ ):  $\delta$ , 1.96, 1.98, 2.02, 2.04 (4 s, 12 H,  $4 \times \text{COCH}_3$ ), 3.68-3.73 (m, 1H,  $J_{5,6a} = 5.1$  Hz, H-5), 4.15 (dd, 1H,  $J_{6a,6b} = 12.1$  Hz, H-6a), 4.21 (dd, 1H, H-6b), 4.66 (d, 1H,  $J_{1,2} = 10.1$  Hz, H-1), 4.91 (dd, 1H,  $J_{2,3} = 9.2$  Hz, H-2), 5.01 (dd, 1H,  $J_{4,5} = 9.9$  Hz, H-4), 5.23 (dd, 1H,  $J_{3,4} = 9.3$  Hz, H-3), 7.26-7.49 (m, 5H, aromatic) ppm;  $^{13}\text{C}$  NMR ( $\text{CDCl}_3$ ):  $\delta$ , 20.8 ( $\times 2$ ), 20.9 ( $\times 2$ ), 62.3, 68.4, 70.1, 74.1, 75.9, 85.9, 128.6, 129.1 ( $\times 2$ ), 131.8, 133.3 ( $\times 2$ ), 169.4, 169.6, 170.3, 170.7 ppm.

**Phenyl 2,3,4,6-tetra-*O*-acetyl-1-thio- $\beta$ -D-galactopyranoside (14).**

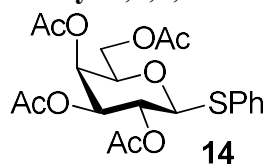

The title compound was synthesized as described for the synthesis of **2**. The analytical data for **14** was in agreement with that reported previously.<sup>4,11</sup> Spectral data for **14**: <sup>1</sup>H NMR (CDCl<sub>3</sub>):  $\delta$ , 1.96, 2.02, 2.08, 2.10 (4 s, 12H, 4  $\times$  COCH<sub>3</sub>), 3.93 (m, 1H,  $J_{5,6}$  = 6.6 Hz, H-5), 4.12 (m, 2H, H-6a,b), 4.7 (d, 1H,  $J_{1,2}$  = 9.9 Hz, H-1), 5.03 (dd, 1H,  $J_{3,4}$  = 3.3 Hz, H-3), 5.23 (dd, 1H,  $J_{2,3}$  = 10.0 Hz, H-2), 5.42 (dd, 1H,  $J_{4,5}$  = 1.0 Hz, H-4), 7.28-7.52 (m, 5H, aromatic) ppm; <sup>13</sup>C NMR (CDCl<sub>3</sub>):  $\delta$ , 20.6 ( $\times$ 2), 61.6, 67.1, 71.9, 71.3, 76.6, 86.5, 128.1, 128.8 ( $\times$ 2), 132.4 ( $\times$ 2), 132.5, 169.4, 169.6, 170.1, 170.2, 170.4 ppm.

**Phenyl 2,3,4,6-tetra-*O*-acetyl-1-thio- $\alpha$ -D-mannopyranoside (15).**

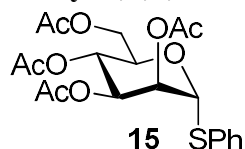

The title compound was synthesized as described for the synthesis of **2**. The analytical data for **15** was in agreement with that reported previously.<sup>11,12</sup> Spectral data for **15**: <sup>1</sup>H NMR (CDCl<sub>3</sub>):  $\delta$ , 2.01, 2.05, 2.08, 2.16 (4 s, 12H, 4  $\times$  COCH<sub>3</sub>), 4.10 (m, 1H), 4.30 (dd, 1H), 4.51-4.57 (m, 1H), 5.29-5.36 (m, 2H, H-2, 3), 5.50 (d, 1H, H-1), 5.42 (dd, 1H, H-4), 7.28-7.52 (m, 5H, aromatic) ppm; <sup>13</sup>C NMR (CDCl<sub>3</sub>):  $\delta$ , 20.6 ( $\times$ 2), 20.8, 62.3, 66.2, 70.8, 71.7, 85.6, 128.1, 129.0 ( $\times$ 2), 132.0 ( $\times$ 2), 133.2, 169.6, 169.7 ( $\times$ 2), 169.8, 170.4 ppm.

**Methyl (phenyl 5-acetamido-4,7,8,9-tetra-*O*-acetyl-3,5-dideoxy-2-thio-D-glycero-D-galactonon-2-ulo)pyranosid)onate (16).**

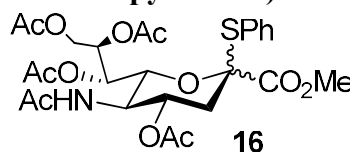

The title compound was synthesized as described for the synthesis of **2**. The analytical data for **16** was in agreement with that reported previously.<sup>13,14</sup> Selected spectral data for  $\beta$ -**16**: <sup>1</sup>H NMR:  $\delta$ , 1.90, 1.96, 2.04, 2.07, 2.10 (5 s, 15H, 5  $\times$  COCH<sub>3</sub>), 2.68 (dd,  $J_{3eq,3ax}$  = 14.0 Hz, H-3eq), 2.00 (dd, 1H, H-3ax), 4.49 (dd, 1H,  $J_{9a,9b}$  = 10.4 Hz, H-9a), 4.60 (dd, H-9b), 5.40 (n, 1H, H-4), 5.60 (d, 1H,  $J_{5,NH}$  = 10.7 Hz, NH), 7.20-7.60 (m, 5H, aromatic) ppm; Selected spectral data for  $\beta$ -**16**: <sup>1</sup>H NMR:  $\delta$ , 2.81 (dd,  $J_{3eq,3ax}$  = 13.1 Hz, H-3eq), 2.09 (dd, 1H, H-3ax).

***p*-Methylphenyl 2,3,4,6-tetra-*O*-acetyl-1-thio- $\beta$ -D-glucopyranoside (17).**

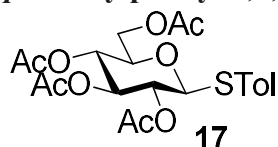

The title compound was synthesized as described for the synthesis of **2**. The analytical data for **17** was in agreement with that reported previously.<sup>1,5,15</sup> Spectral data for **17**: <sup>1</sup>H NMR (CDCl<sub>3</sub>):

$\delta$ , 1.98, 2.01, 2.08, 2.09 (4 s, 12H, 4  $\times$  COCH<sub>3</sub>), 2.35 (s, 3H, CH<sub>3</sub>Ar), 3.67-3.74 (m, 1H,  $J_{5,6a}$  = 5.2 Hz, H-5), 4.17 (dd, 1H,  $J_{6a,6b}$  = 12.0 Hz, H-6a), 4.20 (dd, 1H, H-6b), 4.61 (d, 1H,  $J_{1,2}$  = 10.1 Hz, H-1), 4.91 (dd, 1H,  $J_{2,3}$  = 9.3 Hz, H-2), 5.03 (dd, 1H,  $J_{4,5}$  = 9.6 Hz, H-4), 5.18 (dd, 1H,  $J_{3,4}$  = 9.3 Hz, H-3), 7.10-7.42 (m, 4H, aromatic) ppm; <sup>13</sup>C NMR (CDCl<sub>3</sub>):  $\delta$ , 20.6, 20.7, 20.8, 21.2, 62.1, 68.3, 69.9, 74.1, 75.8, 76.7, 85.8, 127.6, 129.7 ( $\times 2$ ), 133.9 ( $\times 2$ ), 138.8, 169.3, 169.4, 170.2, 170.6 ppm.

***p*-Methylphenyl 2,3,4,6-tetra-*O*-acetyl-1-thio- $\beta$ -D-galactopyranoside (**18**).**

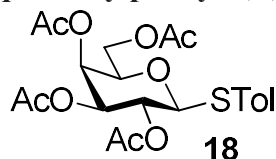

The title compound was synthesized as described for the synthesis of **2**. The analytical data for **18** was in agreement with that reported previously.<sup>15,16</sup> Spectral data for **18**: <sup>1</sup>H NMR (CDCl<sub>3</sub>):  $\delta$ , 1.97, 2.05, 2.10, 2.12 (4 s, 12H, 4  $\times$  COCH<sub>3</sub>), 2.34 (s, 3H, CH<sub>3</sub>Ar), 3.91 (m, 1H,  $J_{5,6}$  = 6.6 Hz, H-5), 4.14 (m, 2H, H-6a, 6b), 4.65 (d, 1H,  $J_{1,2}$  = 9.9 Hz, H-1), 5.03 (dd, 1H,  $J_{3,4}$  = 3.3 Hz, H-3), 5.22 (dd, 1H,  $J_{2,3}$  = 10.0 Hz, H-2), 5.41 (dd, 1H,  $J_{4,5}$  = 1.0 Hz, H-4), 7.10-7.45 (m, 4H, aromatic) ppm; <sup>13</sup>C NMR (CDCl<sub>3</sub>):  $\delta$ , 20.7 ( $\times 2$ ), 20.9, 21.2, 61.6, 67.3, 72.0, 74.3, 86.9, 128.6, 129.6 ( $\times 2$ ), 133.1 ( $\times 2$ ), 138.4, 169.3, 170.1, 170.2, 170.3 ppm.

***p*-Methylphenyl 2,3,4,6-tetra-*O*-acetyl-1-thio- $\alpha$ -D-mannopyranoside (**19**).**

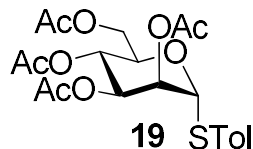

The title compound was synthesized as described for the synthesis of **2**. The analytical data for **19** was in agreement with that reported previously.<sup>17,18</sup> Spectral data for **19**: <sup>1</sup>H NMR (CDCl<sub>3</sub>):  $\delta$ , 1.99, 2.08, 2.10, 2.14 (4 s, 12H, 4  $\times$  COCH<sub>3</sub>), 2.35 (s, 3H, CH<sub>3</sub>Ar), 4.03 (dd, 1H), 4.30 (dd, 1H), 4.50 (m, 1H), 5.29-5.35 (m, 2H), 5.40 (d, 1H,  $J_{1,2}$  = 1.0 Hz, H-1), 5.47 (dd, 1H), 7.10-7.45 (m, 4H, aromatic) ppm; <sup>13</sup>C NMR (CDCl<sub>3</sub>):  $\delta$ , 20.6, 20.7 ( $\times 2$ ), 20.8, 21.1, 62.4, 66.3, 69.3, 70.8, 85.9, 128.7, 129.9 ( $\times 2$ ), 132.6 ( $\times 2$ ), 138.4, 169.7, 169.8, 169.9, 170.1, 170.5 ppm.

**Methyl (*p*-methylphenyl 5-acetamido-4,7,8,9-tetra-*O*-acetyl-3,5-dideoxy-2-thio-D-glycero-D-galacto-non-2-ulopyranosid)onate (**20**).**

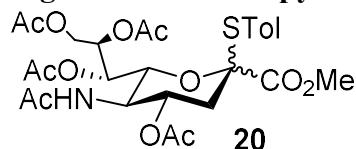

The title compound was synthesized as described for the synthesis of **2**. The analytical data for **20** was in agreement with that reported previously.<sup>18</sup> Selected spectral data for  $\beta$ -**20**: <sup>1</sup>H NMR (CDCl<sub>3</sub>):  $\delta$ , 1.90, 1.96, 2.04, 2.08, 2.11 (5 s, 15H, 5  $\times$  COCH<sub>3</sub>), 2.34 (s, 3H, CH<sub>3</sub>Ar), 2.65 (dd,  $J_{3eq,3ax}$  = 9.5 Hz, H-3eq), 3.61 (s, 3H, OCH<sub>3</sub>), 5.39 (m, 1H, H-4), 6.02 (d, 1H, NH), 7.14-7.33 (d, 4H, aromatic) ppm; <sup>13</sup>C NMR (CDCl<sub>3</sub>):  $\delta$ , 20.7, 20.8 ( $\times 2$ ), 21.0, 21.1, 23.2, 29.2, 37.2, 49.2, 49.4, 52.6, 52.7, 62.2, 67.5, 67.6, 68.7, 68.9, 69.9, 73.0, 76.5, 87, 88.7, 128.7, 128.8, 128.9 ( $\times 3$ ), 136.6 ( $\times 3$ ), 168.2, 170.1, 170.2, 170.3, 170.8, 171.0 ppm.

***p*-Methylphenyl *O*-(2,3,4,6-tetra-*O*-acetyl- $\beta$ -D-galactopyranosyl)-(1 $\rightarrow$ 4)-2,3,6-tri-*O*-acetyl-1-thio- $\beta$ -D-glucopyranoside (**21**).**

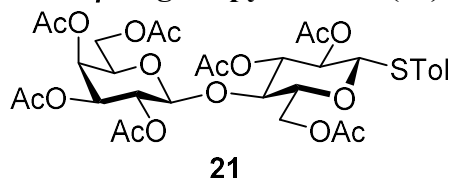

The title compound was synthesized as described for the synthesis of **2**. The analytical data for **21** was in agreement with that reported previously.<sup>18</sup> Spectral data for **21**: <sup>1</sup>H NMR (CDCl<sub>3</sub>):  $\delta$ , 1.92-2.14 (7 s, 21H, 7  $\times$  COCH<sub>3</sub>), 2.31 (s, 3H, CH<sub>3</sub>Ar), 3.63 (m, 1H), 3.72 (dd, 1H), 3.84 (dd, 1H), 4.09-4.22 (m, 3H), 4.48-4.75 (m, 3H), 4.83 (m, 1H), 4.93 (dd, 1H), 5.11 (dd, 1H), 5.21 (dd, 1H), 5.33 (dd, 1H), 7.09-7.49 (m, 4H, aromatic) ppm; <sup>13</sup>C NMR (CDCl<sub>3</sub>):  $\delta$ , 14.8, 20.5, 20.6 ( $\times$ 2), 20.8 ( $\times$ 2), 21.0, 21.1, 29.6, 60.2, 62.0, 66.5, 68.6, 70.9, 73.8, 75.4, 85.9, 101.0, 127.6, 129.8 ( $\times$ 2), 133.3 ( $\times$ 2), 138.6, 169.0, 169.3, 169.5, 169.7, 170.1 ( $\times$ 2) ppm.

**1,3-Thiazolin-2-yl 2,3,4,6-tetra-*O*-acetyl-1-thio- $\beta$ -D-glucopyranoside (**22**).**

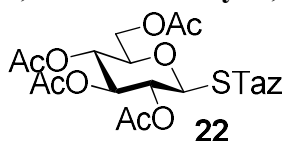

The title compound was synthesized as described for the synthesis of **2**. The analytical data for **22** was in agreement with that reported previously.<sup>1,19</sup> Spectral data for **22**: <sup>1</sup>H NMR (CDCl<sub>3</sub>):  $\delta$ , 1.98, 2.01, 2.03, 2.06 (4 s, 12H, 4  $\times$  CH<sub>3</sub>CO), 3.35 (t, 2H, CH<sub>2</sub>N), 3.76-3.83 (m, 1H,  $J_{5,6a}$  = 2.3 Hz,  $J_{5,6b}$  = 4.5 Hz, H-5), 4.09-4.30 (m, 4H, H-6a, 6b, CH<sub>2</sub>S), 5.08 (dd, 1H,  $J_{4,5}$  = 9.5 Hz, H-4), 5.13 (dd, 1H,  $J_{2,3}$  = 8.3 Hz, H-2), 5.21 (dd, 1H,  $J_{3,4}$  = 8.3 Hz, H-3), 5.41 (d, 1H,  $J_{1,2}$  = 10.4 Hz, H-1) ppm; <sup>13</sup>C NMR (CDCl<sub>3</sub>):  $\delta$ , 20.5 ( $\times$ 2), 20.6, 20.7, 35.3, 61.7, 64.2, 68.1, 67.8, 69.3, 73.8, 76.0, 83.0, 162.7, 169.5, 170.1, 170.6 ppm.

**1,3-Thiazolin-2-yl 2,3,4,6-tetra-*O*-acetyl-1-thio- $\beta$ -D-galactopyranoside (**23**).**

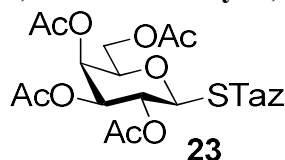

The title compound was synthesized as described for the synthesis of **2**. The analytical data for **23** was in agreement with that reported previously.<sup>19</sup> Spectral data for **23**: <sup>1</sup>H NMR (CDCl<sub>3</sub>):  $\delta$ , 1.99, 2.04, 2.06, 2.13 (4 s, 12H, 4  $\times$  COCH<sub>3</sub>), 3.40 (t, 2H, CH<sub>2</sub>N), 4.02 (m, 1H, H-5), 4.10-4.35 (m, 4H, H-6a, 6b, CH<sub>2</sub>S), 5.10 (dd, 1H,  $J_{3,4}$  = 3.4 Hz, H-3), 5.31 (dd, 1H,  $J_{2,3}$  = 10.1 Hz, H-2), 5.45 (s, 1H, H-4), 5.46 (d, 1H,  $J_{1,2}$  = 10.0 Hz, H-1) ppm; <sup>13</sup>C NMR (CDCl<sub>3</sub>):  $\delta$ , 20.5, 20.6, 20.7, 20.8, 35.2, 61.1, 64.1, 66.7, 67.0, 71.7, 74.7, 83.4, 162.8, 169.6, 169.9, 170.2, 170.3 ppm.

### 1,3-Thiazolin-2-yl 2,3,4,6-tetra-O-acetyl-1-thio- $\alpha$ -D-mannopyranoside (**24**).

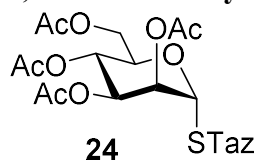

The title compound was synthesized as described for the synthesis of **2**. The analytical data for **24** was in agreement with that reported previously.<sup>19</sup> Spectral data for **24**: <sup>1</sup>H NMR (CDCl<sub>3</sub>):  $\delta$ , 1.96, 2.01, 2.05, 2.13 (4 s, 12H, 4  $\times$  COCH<sub>3</sub>), 3.39 (t, 2H, CH<sub>2</sub>N), 4.04-4.13 (m, 2H, H-5, H-6b), 4.16-4.38 (m, 3H, H-6a, CH<sub>2</sub>S), 5.11 (dd, 1H, H-3), 5.32 (dd, 1H, H-4), 5.42 (dd,  $J_{2,3}$  = 3.2 Hz, 1H, H-2), 6.20 (d,  $J_{1,2}$  = 1.3 Hz, 1H, H-1) ppm; <sup>13</sup>C NMR (CDCl<sub>3</sub>):  $\delta$ , 20.6, 20.7 ( $\times 2$ ), 20.8, 35.5, 62.0, 64.0, 65.7, 69.3, 70.6, 71.39, 82.6, 161.2, 169.3, 169.5 ( $\times 2$ ), 170.6 ppm.

### References

- (1) Parameswar, A. R.; Imamura, A.; Demchenko, A. V.: Synthesis of thioglycosides and thioimidates from peracetates. In *Carbohydrate Chemistry: Proven Synthetic Methods*; Kovac, P., Ed.; CRC Press, 2012; Vol. 1; pp 187-196.
- (2) Contour, M. O.; Defaye, J.; Little, M.; Wong, E. Zirconium (IV) chloride-catalyzed synthesis of 1,2-trans-thioglycopyranosides. *Carbohydr. Res.* **1989**, *193*, 283-287.
- (3) Ibatullin, F. M.; Selivanov, S. I.; Shavva, A. G. A general procedure for conversion of S-glycosyl isothioureia derivatives into thioglycosides, thiooligosaccharides and glycosyl thioesters. *Synthesis* **2001**, 419-422.
- (4) Valerio, S.; Iadonisi, A.; Adinolfi, M.; Ravida, A. Novel Approaches for the Synthesis and Activation of Thio- and Selenoglycoside Donors. *J. Org. Chem.* **2007**, *72*, 6097-6106.
- (5) Mukhopadhyay, B.; Kartha, K. P. R.; Russell, D. A.; Field, R. A. Streamlined Synthesis of Per-O-acetylated Sugars, Glycosyl Iodides, or Thioglycosides from Unprotected Reducing Sugars. *J. Org. Chem.* **2004**, *69*, 7758-7760.
- (6) McGeary, R. P.; Wright, K.; Toth, I. Conversion of Glucosamine to Galactosamine and Allosamine Derivatives: Control of Inversions of Stereochemistry at C-3 and C-4. *J. Org. Chem.* **2001**, *66*, 5102-5105.
- (7) Landström, J.; Bergström, M.; Hamark, C.; Ohlson, S.; Widmalm, G. Combining weak affinity chromatography, NMR spectroscopy and molecular simulations in carbohydrate-lysozyme interaction studies. *Org. Biomol. Chem.* **2012**, *10*, 3019-3032.
- (8) Tsvetkov, Y. E.; Nifantiev, N. E. Enhanced Sialylating activity of O-chloroacetylated 2-thioethyl sialosides. *Synlett* **2005**, *9*, 1375-1380.
- (9) Marra, A.; Sinay, P. Stereoselective synthesis of 2-thioglycosides of N-acetylneuraminic acid. *Carbohydr. Res.* **1989**, *187*, 35-42.
- (10) Niggemann, J.; Kamerling, J. P.; Vliegthart, J. F. G. Application of b-1,4-galactosyltransferase in the synthesis of complex branched-chain oligosaccharide mimics of fragments of the capsular polysaccharide of *Streptococcus pneumoniae* type 14. *J. Chem. Soc., Perkin Trans. I* **1998**, 3011-3020.
- (11) Weng, S.-S.; Lin, Y.-D.; Chen, C.-T. Highly Diastereoselective Thioglycosylation of Functionalized Peracetylated Glycosides Catalyzed by MoO<sub>2</sub>Cl<sub>2</sub>. *Org. Lett.* **2006**, *8*, 5633-5636.

- (12) Ahmadipour, S.; Pergolizzi, G.; Rejzek, M.; Field, R. A.; Miller, G. J. Chemoenzymatic Synthesis of C6-Modified Sugar Nucleotides To Probe the GDP-d-Mannose Dehydrogenase from *Pseudomonas aeruginosa*. *Org. Lett.* **2019**, *21*, 4415-4419.
- (13) Parameswar, A. R.; Mueller, D.; Liu, L.; Meo, C. D.; Demchenko, A. V.: Synthesis of thioglycosides and thioimidates from glycosyl halides In *Carbohydrate Chemistry: Proven Synthetic Methods*; Kovac, P., Ed.; CRC Press, 2012; Vol. 1; pp 181-186.
- (14) Kirchner, E.; Thiem, F.; Dernick, R.; Heukeshoven, J.; Thiem, J. Studies on the glycosylation of N-acetylneuraminic acid. *J. Carbohydr. Chem.* **1988**, *7*, 453-486.
- (15) Kondo, H.; Aoki, S.; Ichikawa, Y.; Halcomb, R. L.; Ritzen, H.; Wong, C. H. Glycosyl phosphites as glycosylation reagents: scope and mechanism. *J. Org. Chem.* **1994**, *59*, 864-877.
- (16) Panza, M.; Mannino, M. P.; Baryal, K. N.; Demchenko, A. V.: A facile synthesis and characterization of p-tolyl 2,3,4,6-tetra-O-benzoyl-1-thio- $\beta$ -D-galactopyranoside. In *Carbohydrate Chemistry: Proven Synthetic Methods*; Wrodnigg, T., Ed.; CRC Press, 2019; Vol. 5; pp in press.
- (17) Chatterjee, D.; Paul, A.; Rajkamal, R.; Yadav, S. Cu(ClO<sub>4</sub>)<sub>2</sub>·6H<sub>2</sub>O catalyzed solvent free per-O-acetylation and sequential one-pot conversions of sugars to thioglycosides. *RSC Adv.* **2015**, *5*, 29669-29674.
- (18) Chao, C.-S.; Chen, M.-C.; Lin, S.-C.; Mong, K.-K. T. Versatile acetylation of carbohydrate substrates with bench-top sulfonic acids and application to one-pot syntheses of peracetylated thioglycosides. *Carbohydr. Res.* **2008**, *343*, 957-964.
- (19) Pornsuriyasak, P.; Demchenko, A. V. S-Thiazoliny (STaz) glycosides as versatile building blocks for convergent selective, chemoselective, and orthogonal oligosaccharide synthesis. *Chem. Eur. J.* **2006**, *12*, 6630-6646.



# **NMR Spectra**

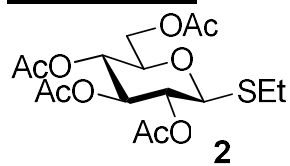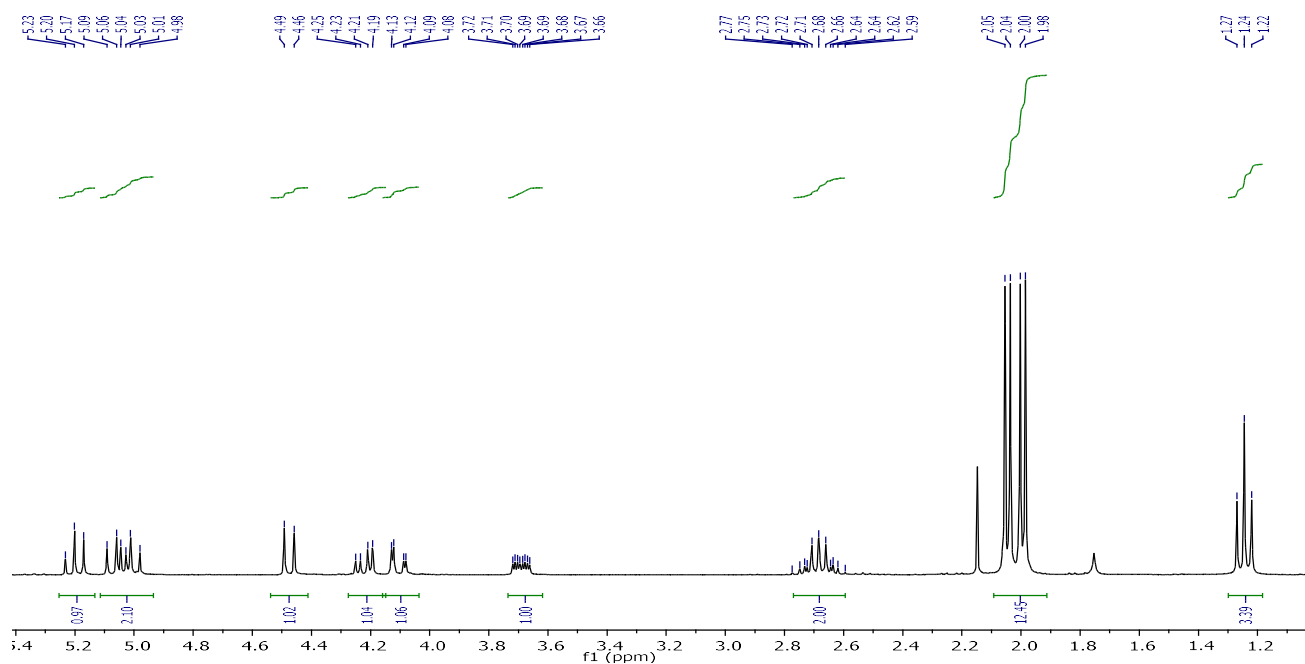

CDCl<sub>3</sub> 300 MHz

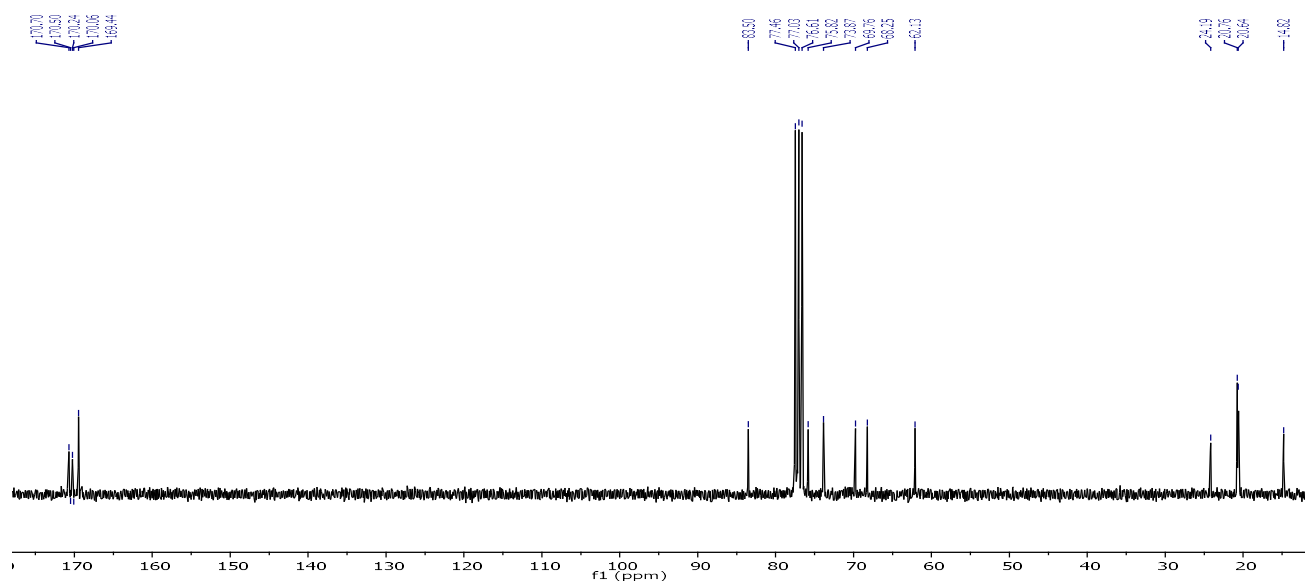

CDCl<sub>3</sub> 75 MHz

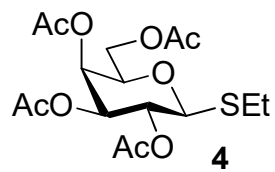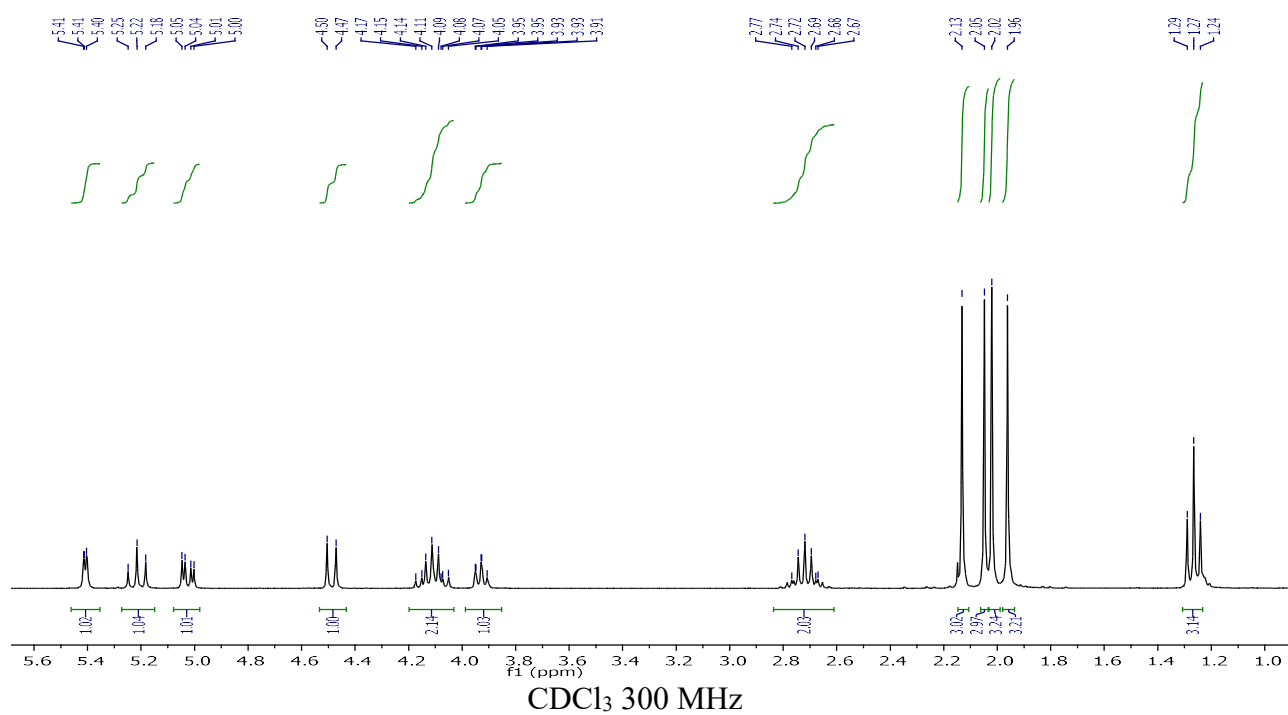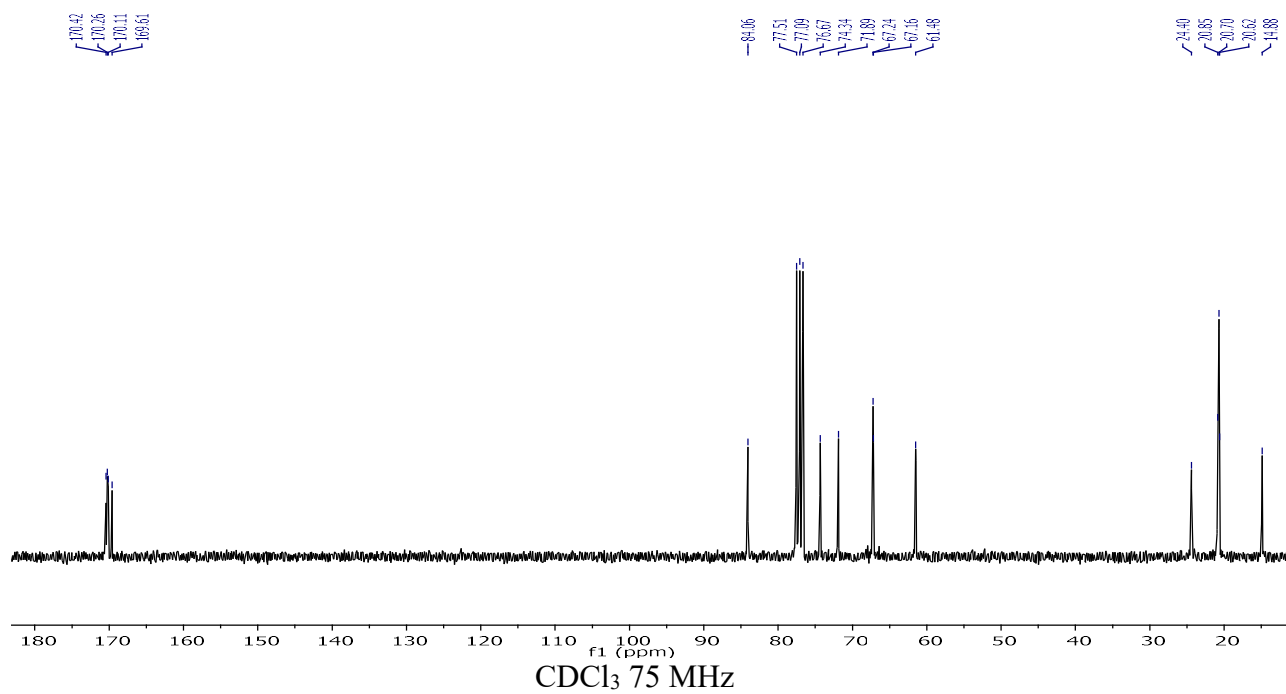

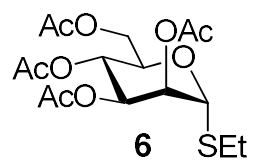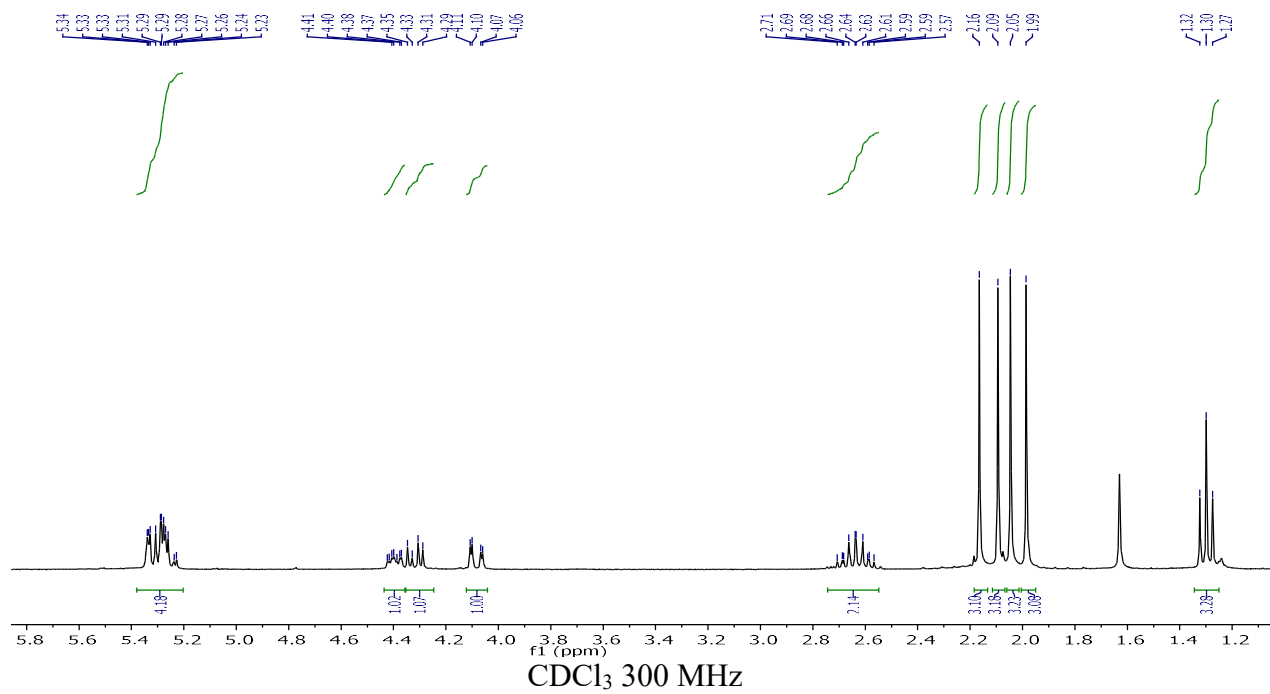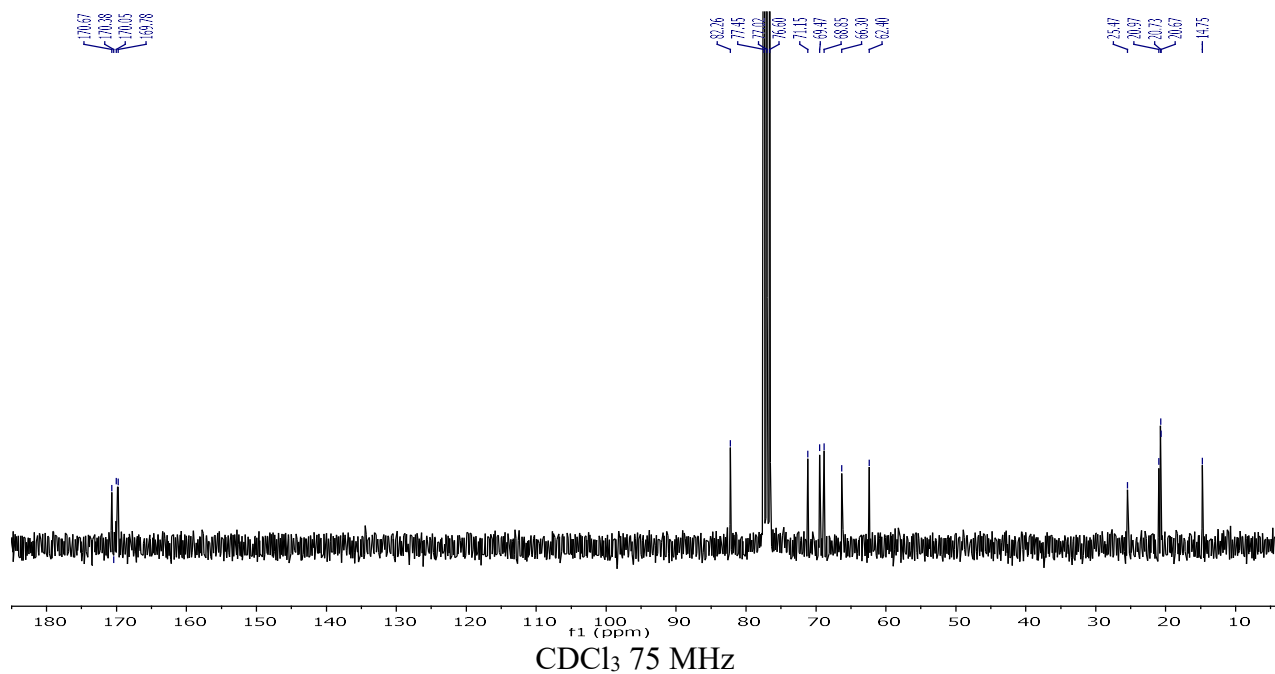

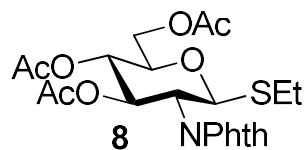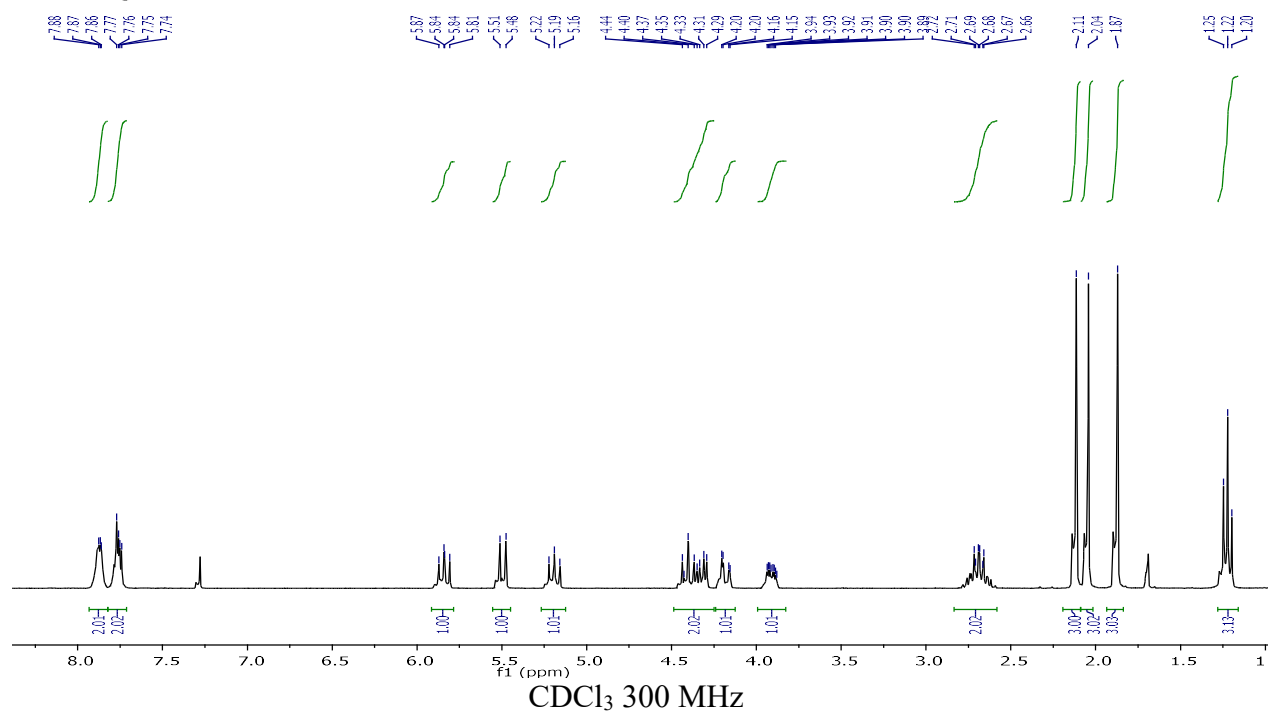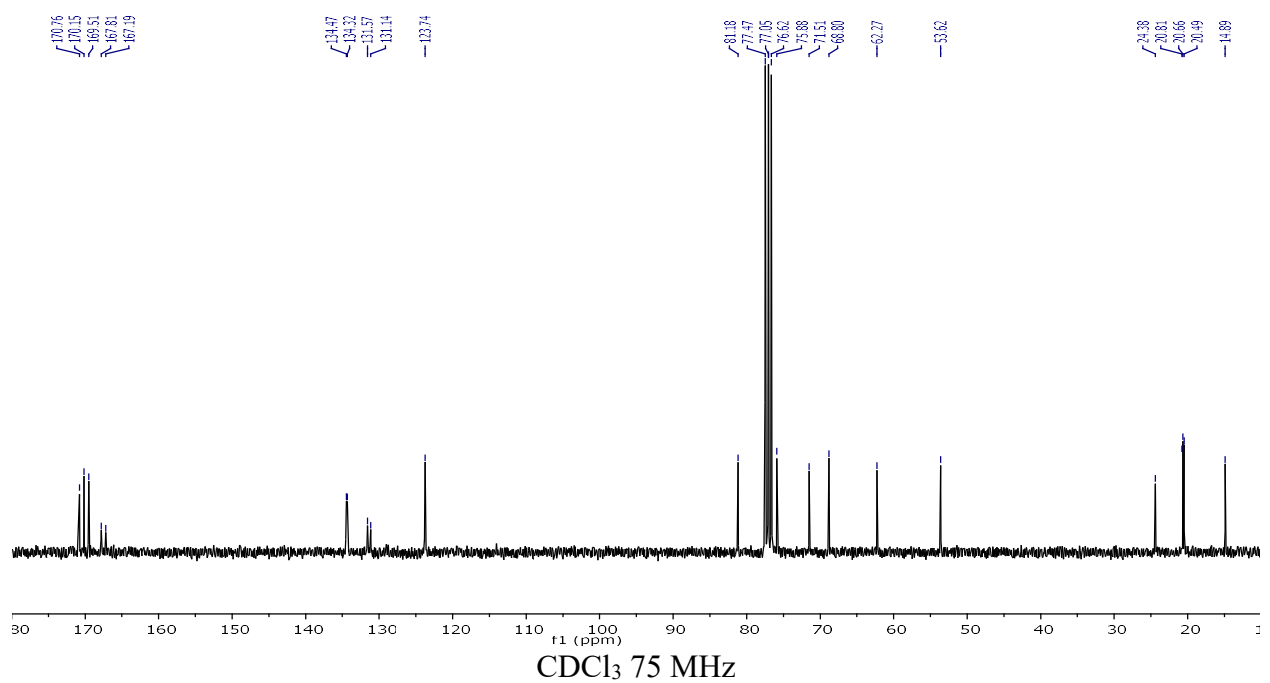

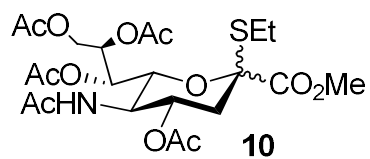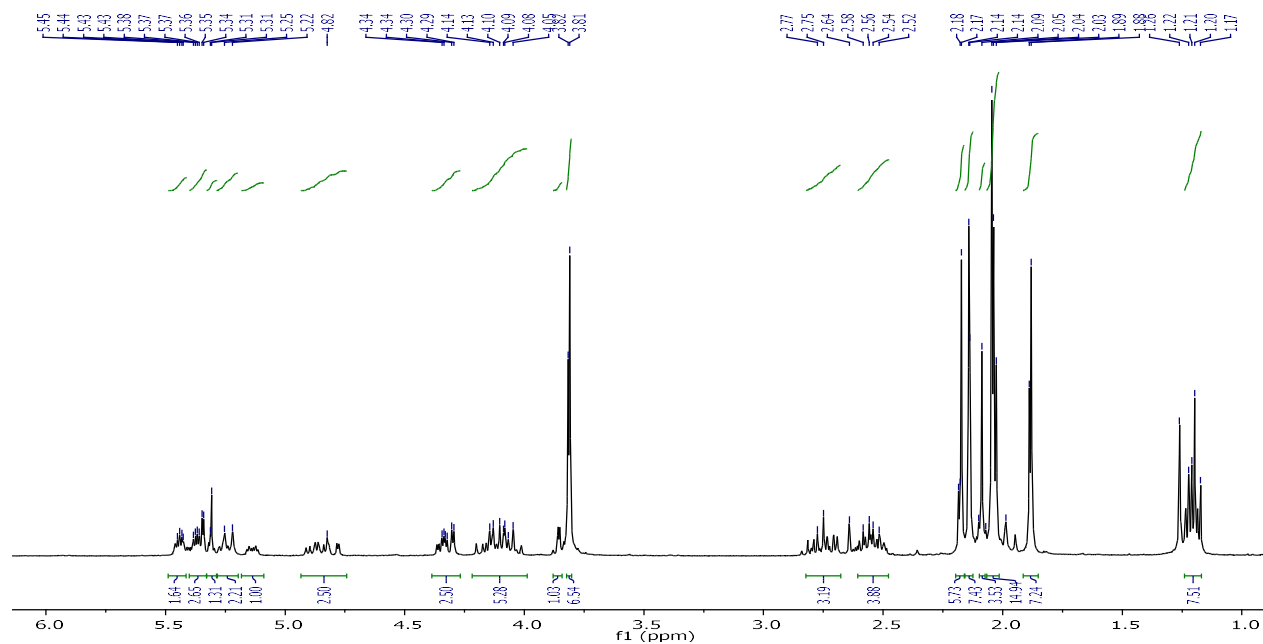

CDCl<sub>3</sub> 300 MHz

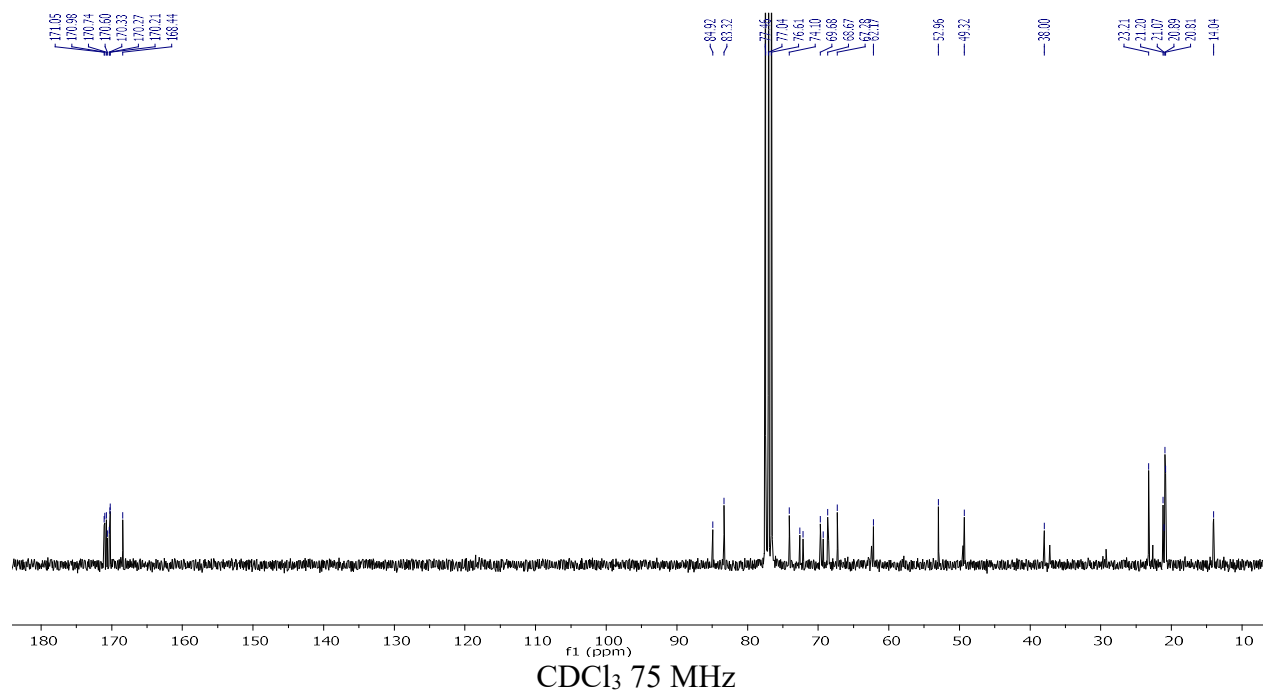

CDCl<sub>3</sub> 75 MHz

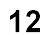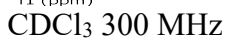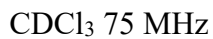

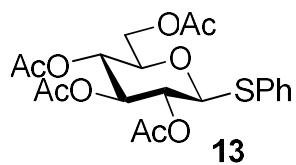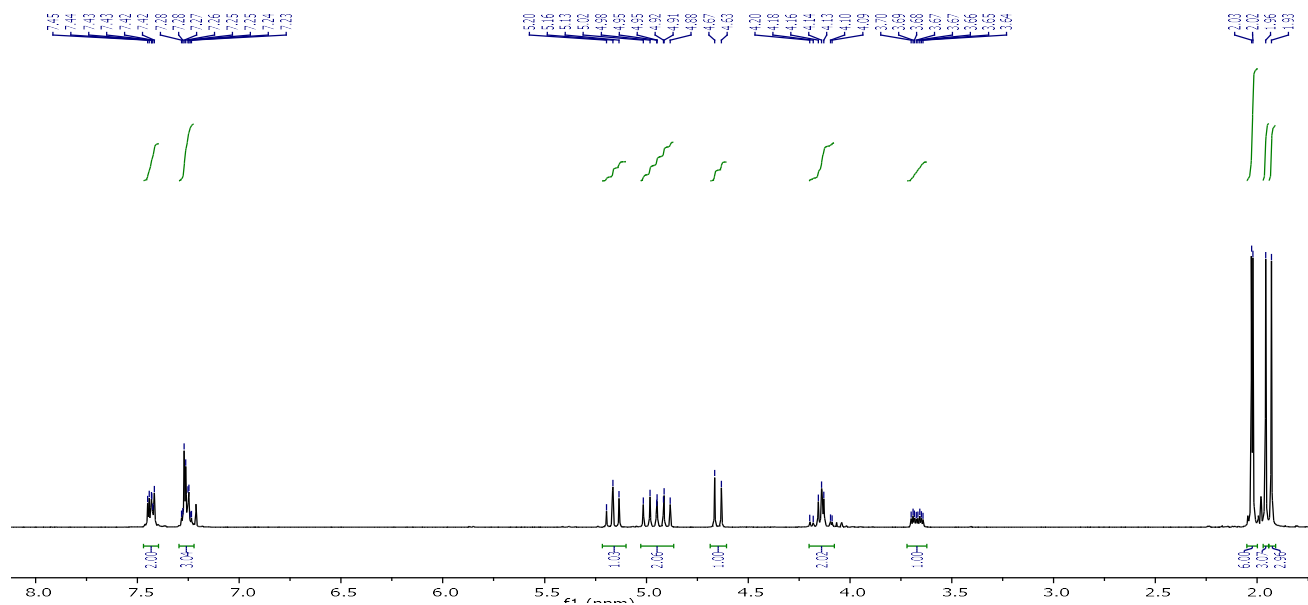

CDCl<sub>3</sub> 300 MHz

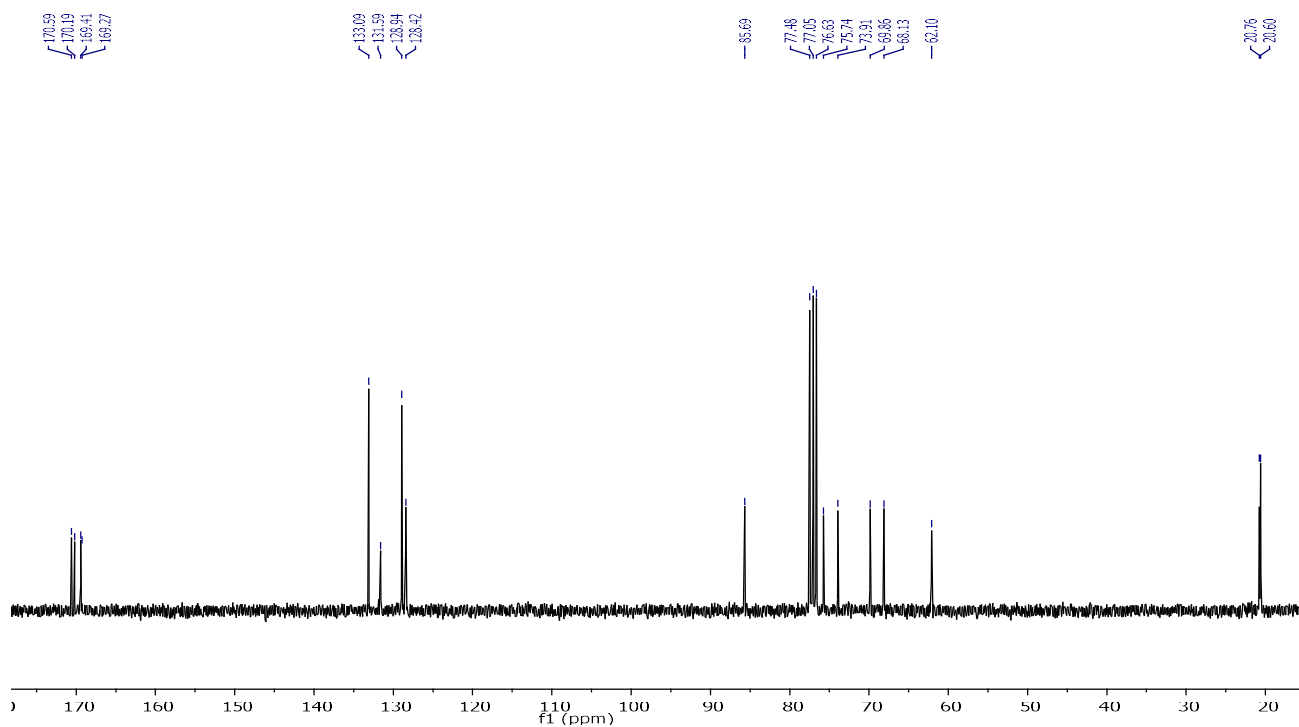

CDCl<sub>3</sub> 75 MHz

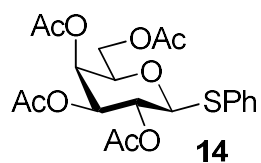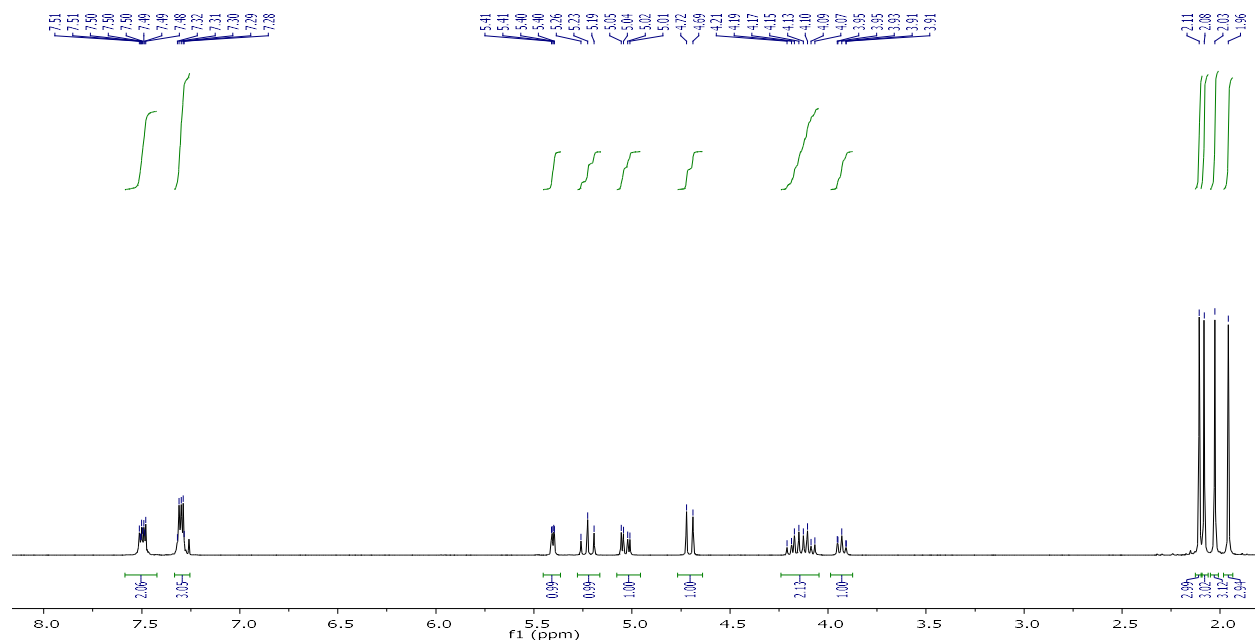

CDCl<sub>3</sub> 300 MHz

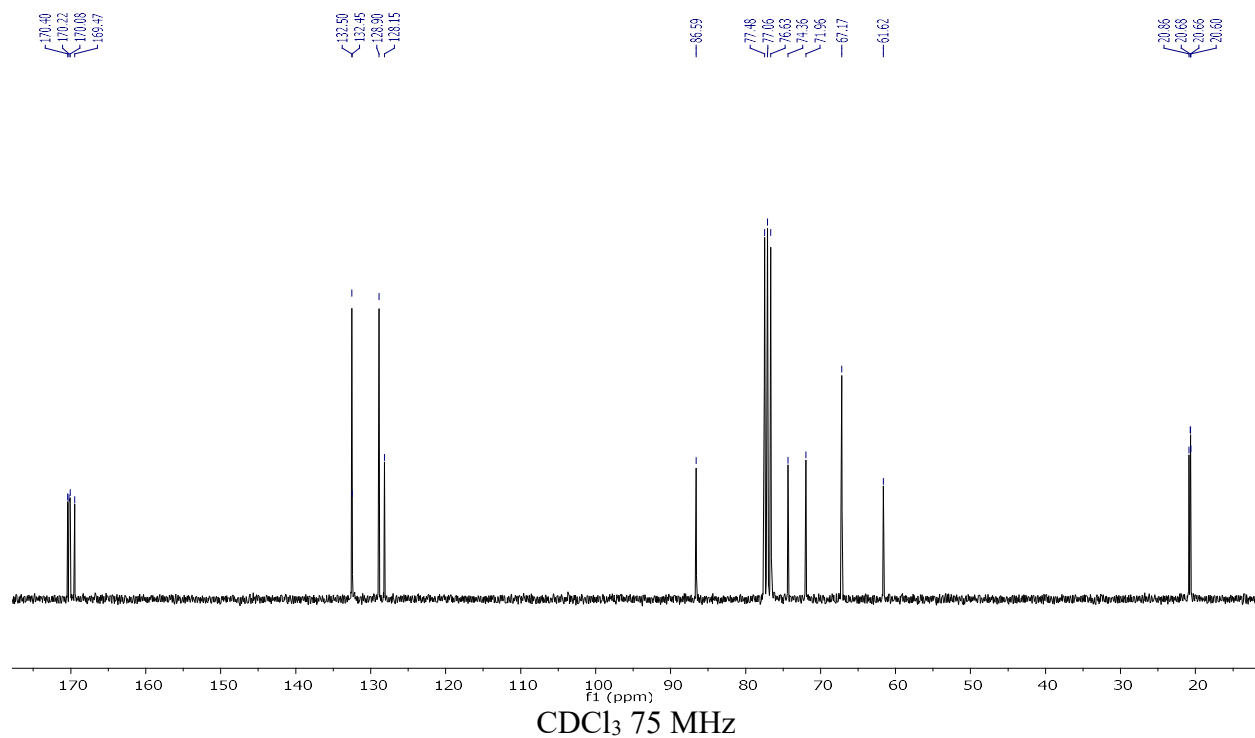

CDCl<sub>3</sub> 75 MHz



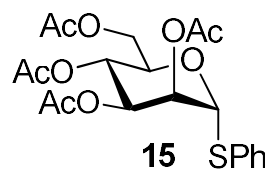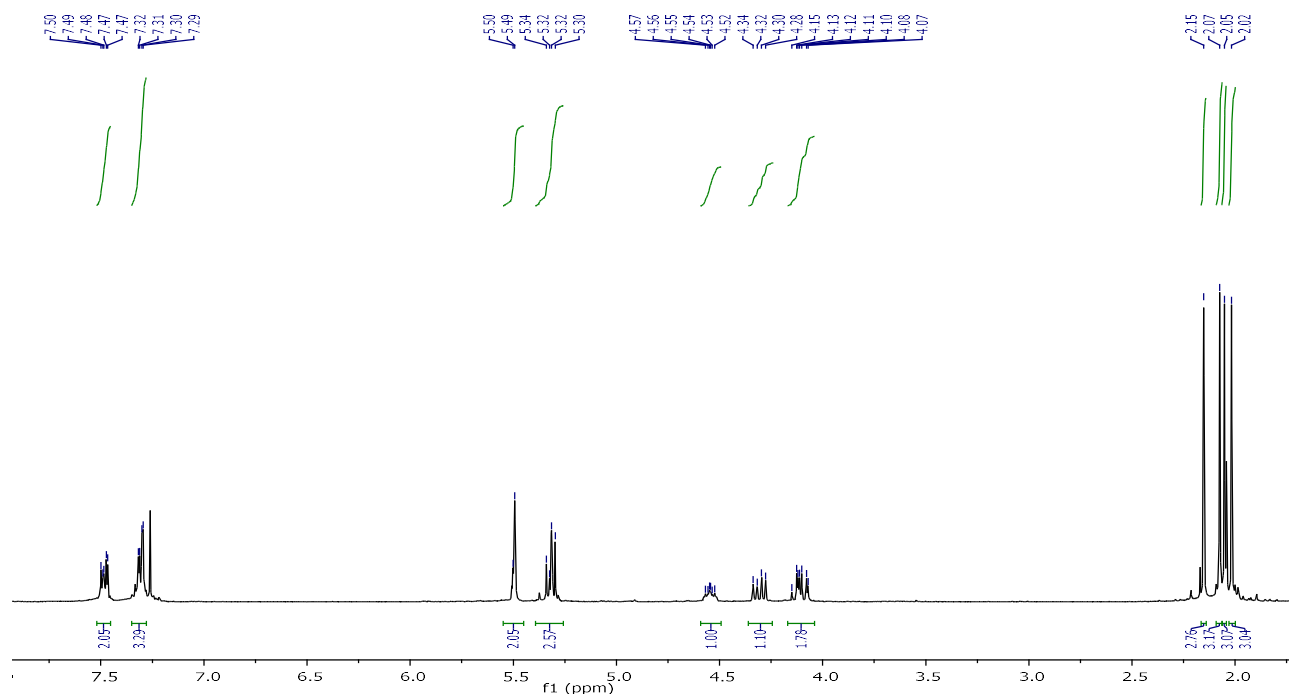

CDCl<sub>3</sub> 300 MHz

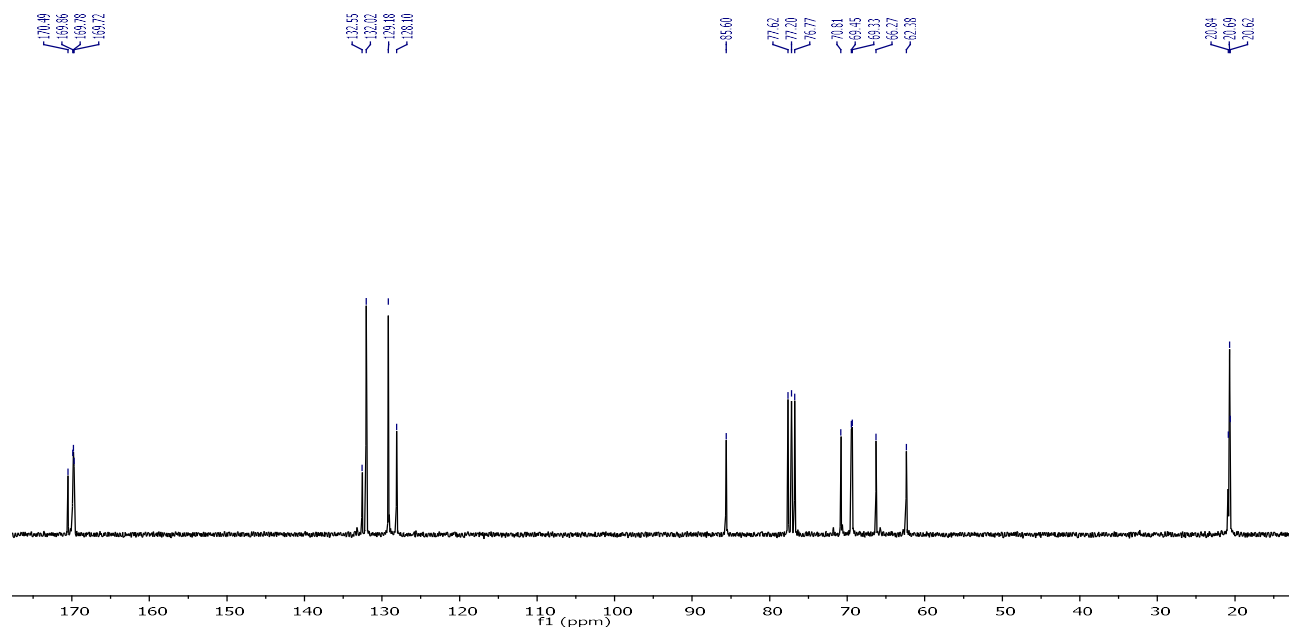

CDCl<sub>3</sub> 75 MHz

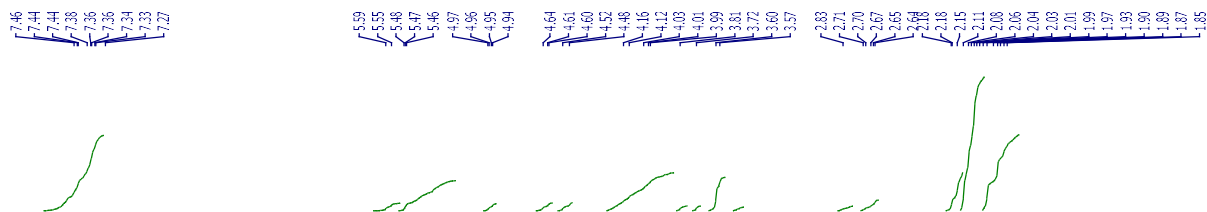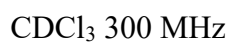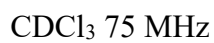

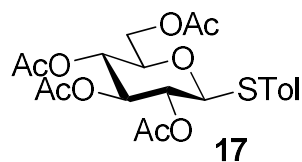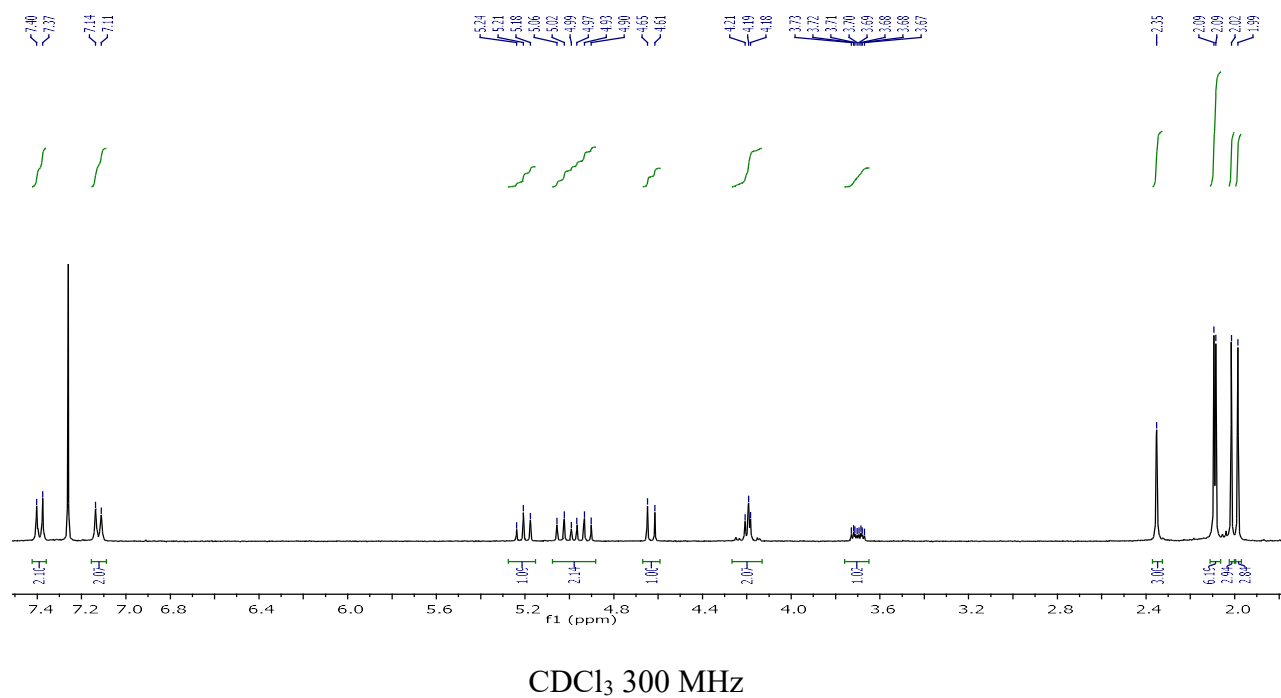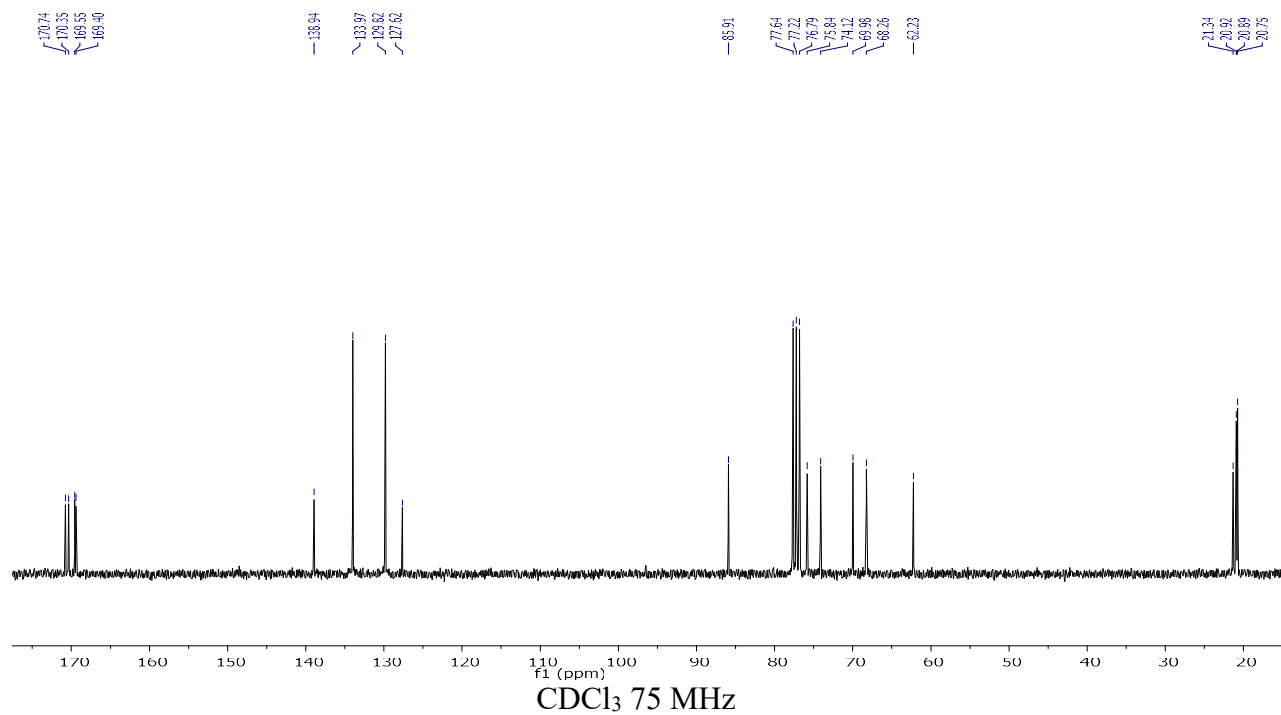

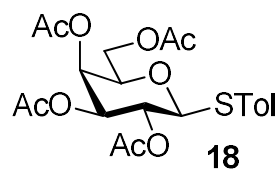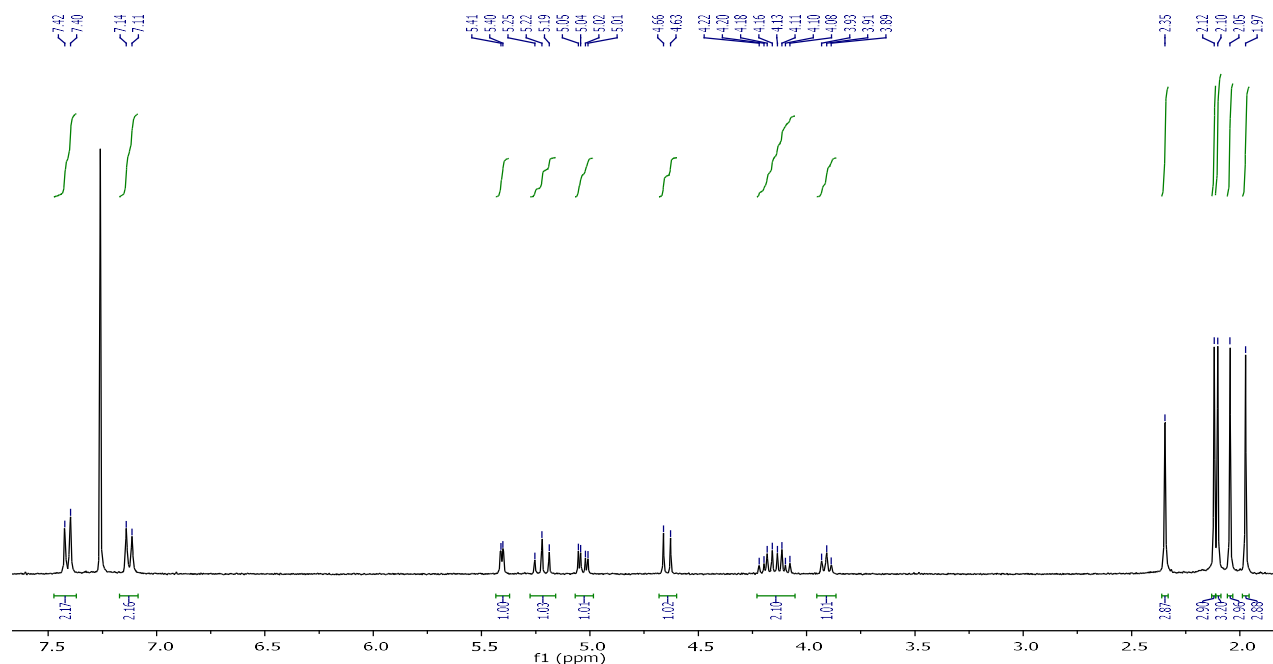

CDCl<sub>3</sub> 300 MHz

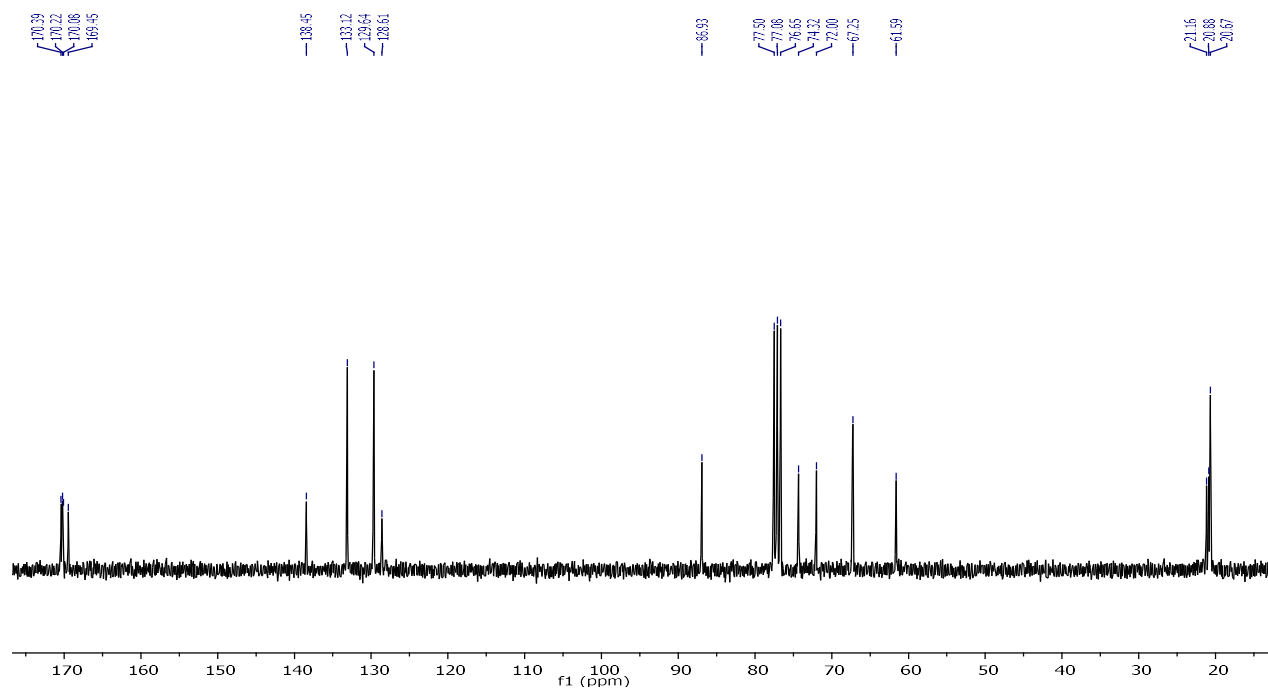

CDCl<sub>3</sub> 75 MHz

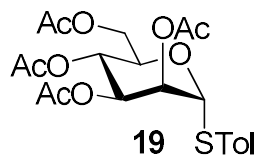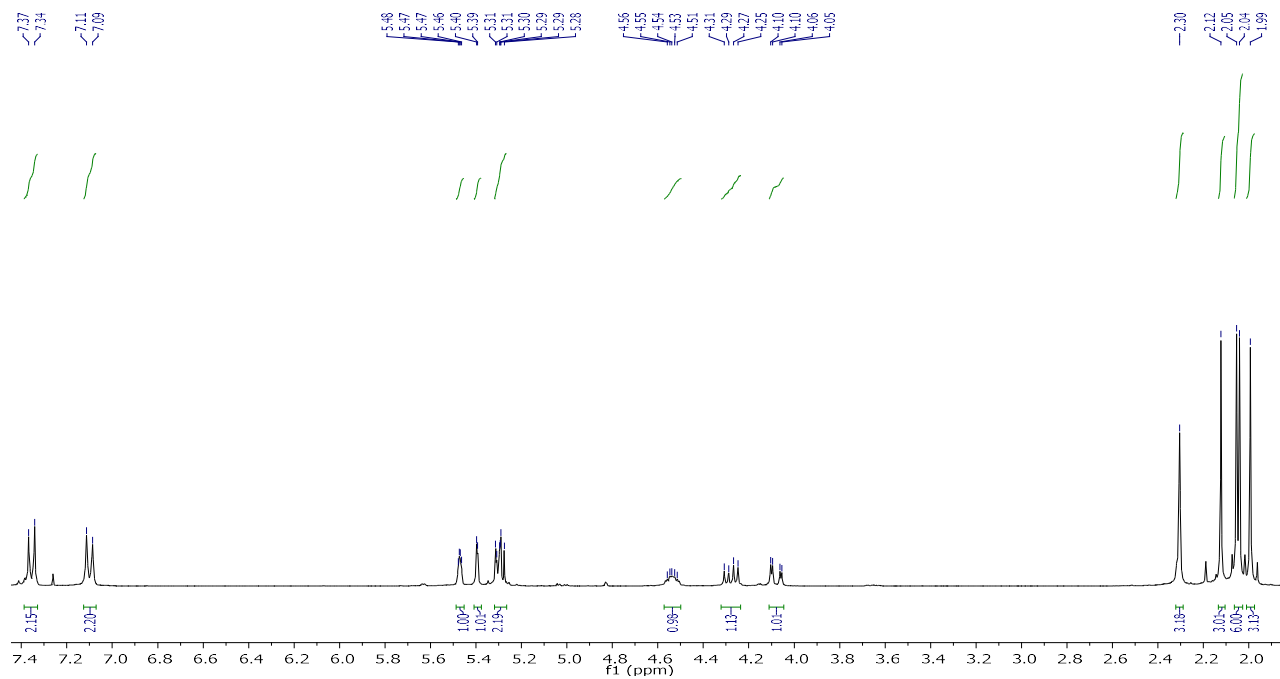

CDCl<sub>3</sub> 300 MHz

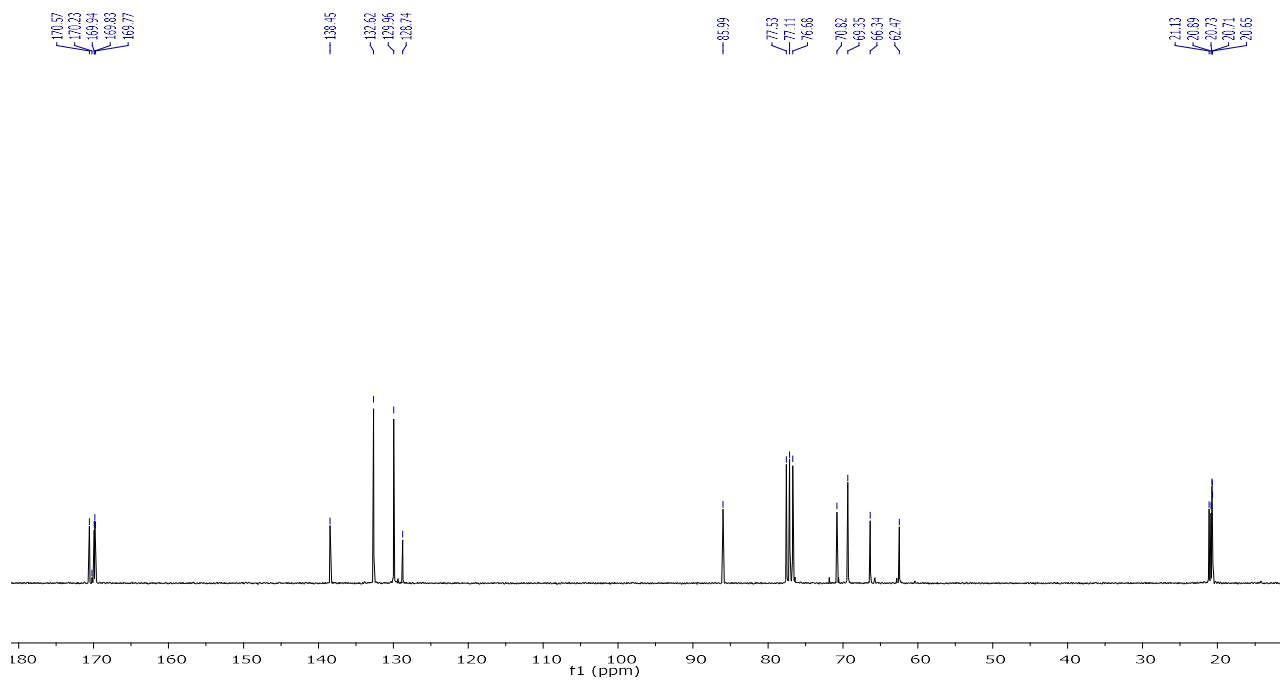

CDCl<sub>3</sub> 75 MHz

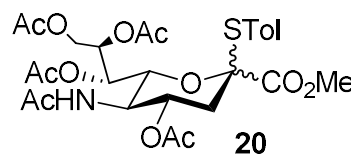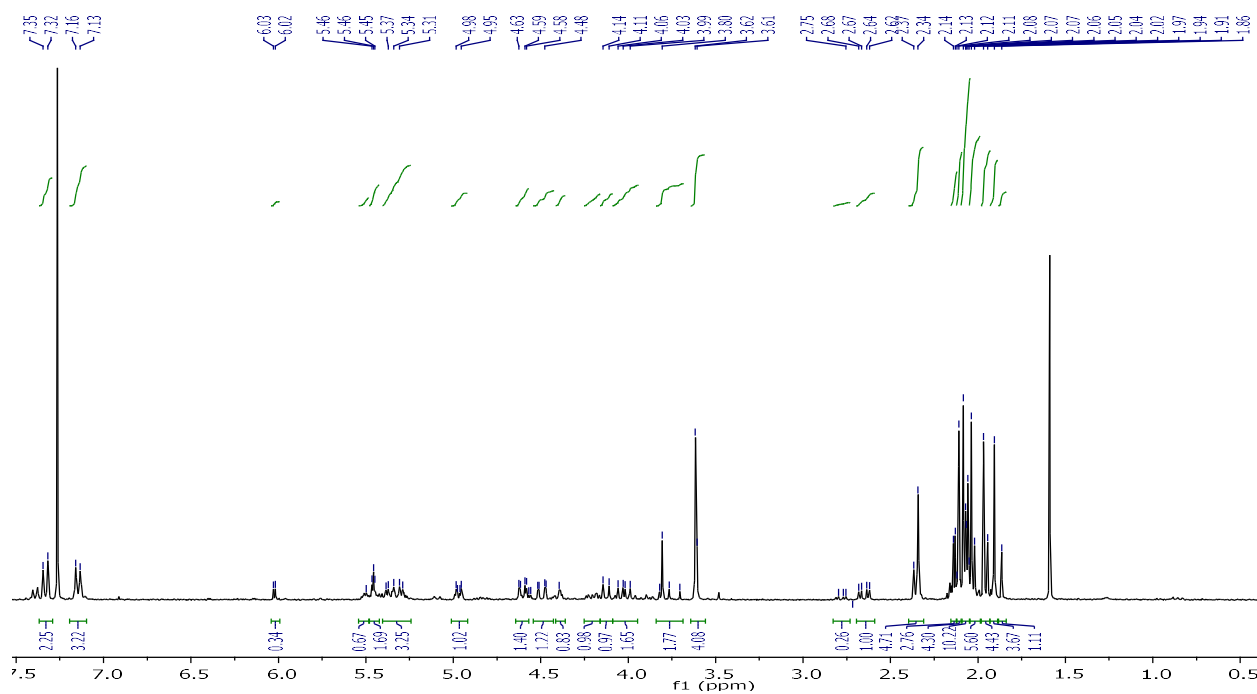

CDCl<sub>3</sub> 300 MHz

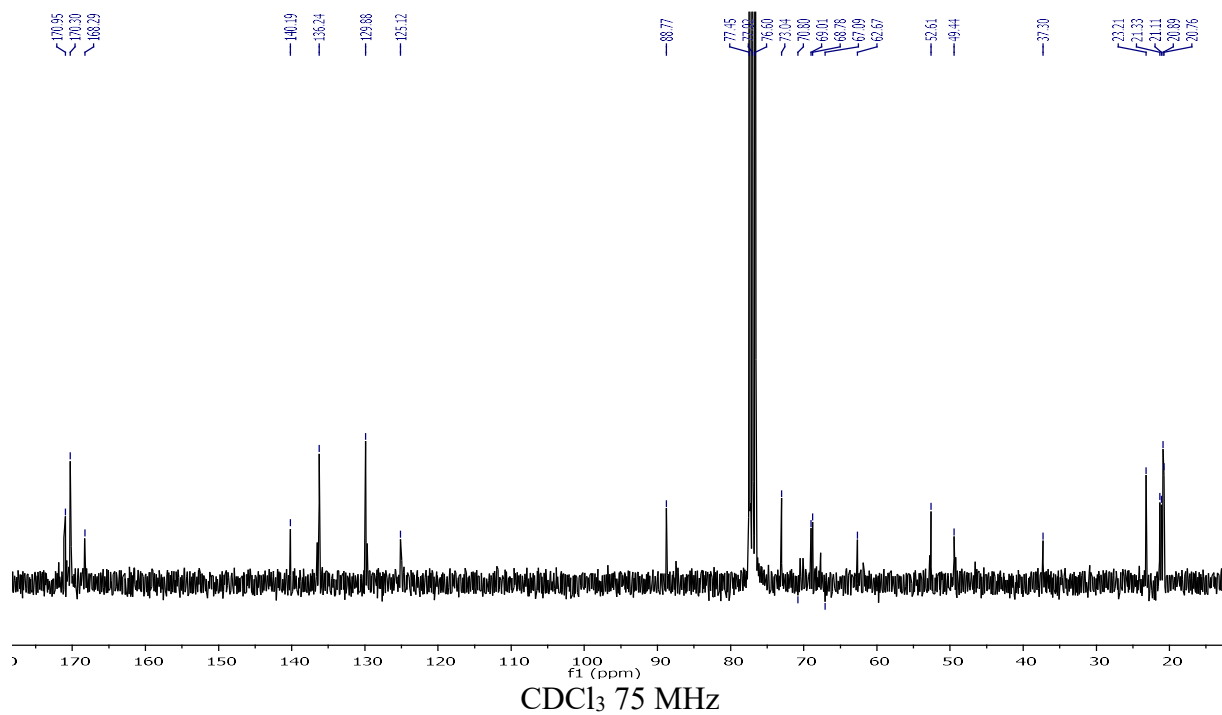

CDCl<sub>3</sub> 75 MHz

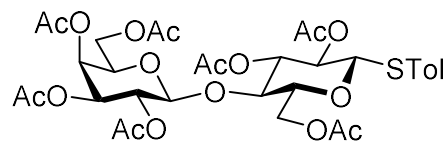

21

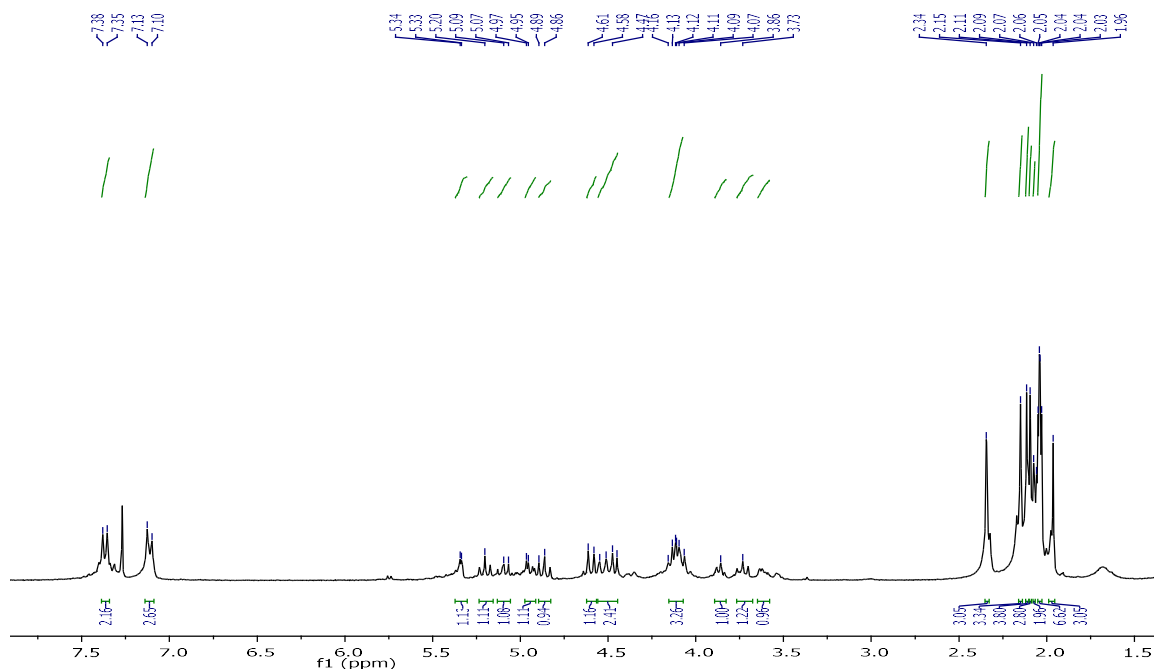

CDCl<sub>3</sub> 300 MHz

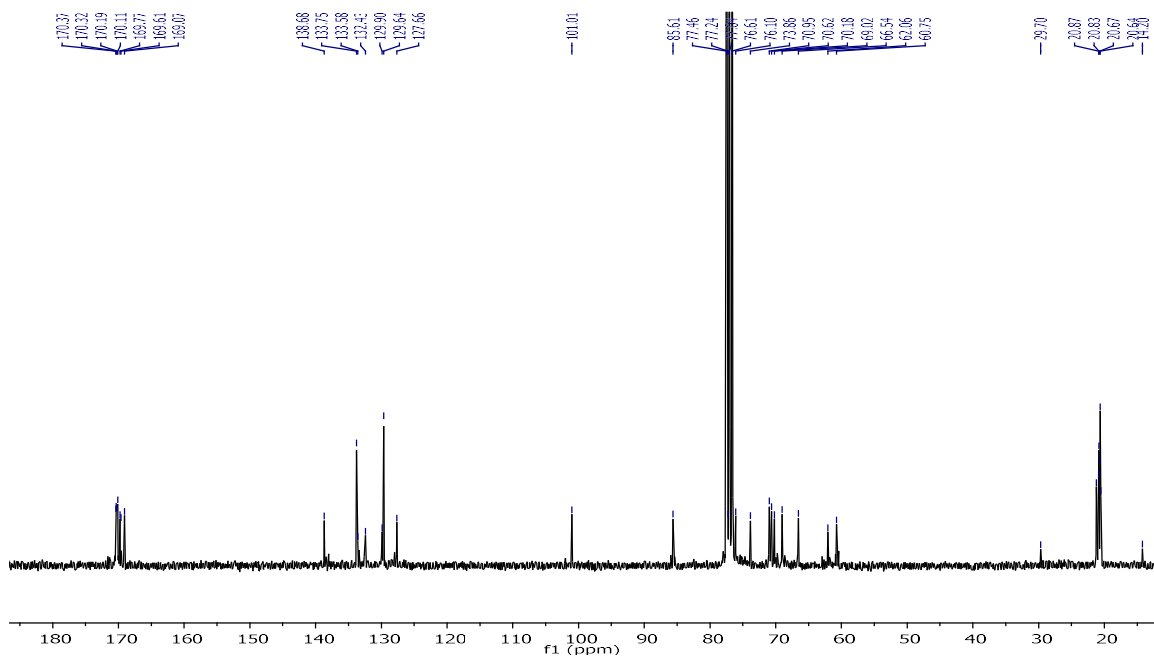

CDCl<sub>3</sub> 75 MHz

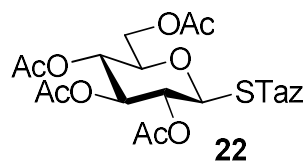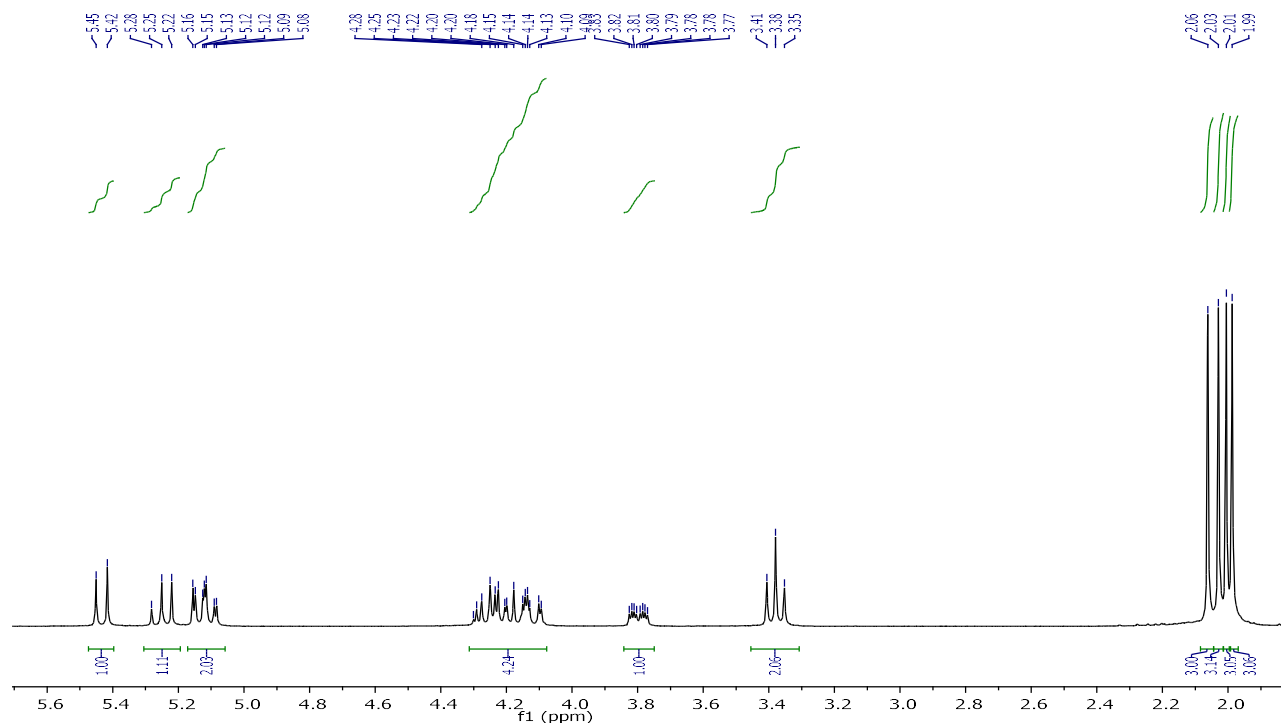

CDCl<sub>3</sub> 300 MHz

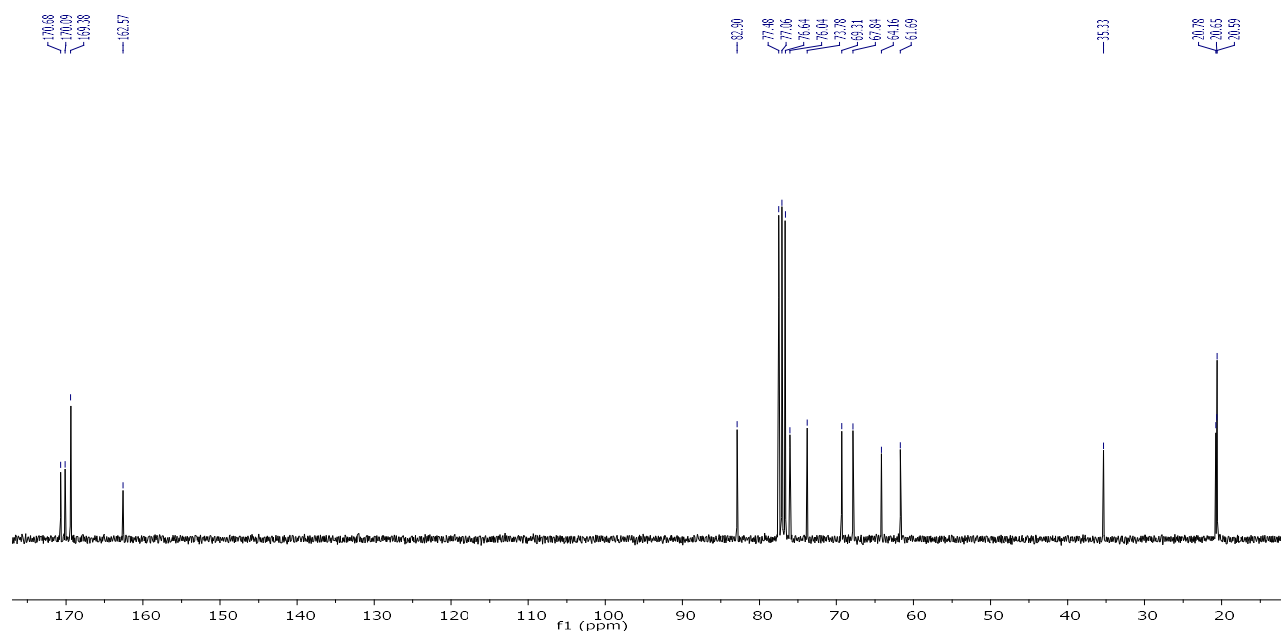

CDCl<sub>3</sub> 75 MHz



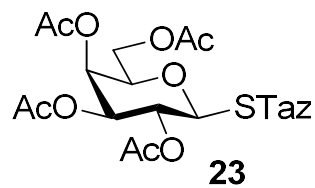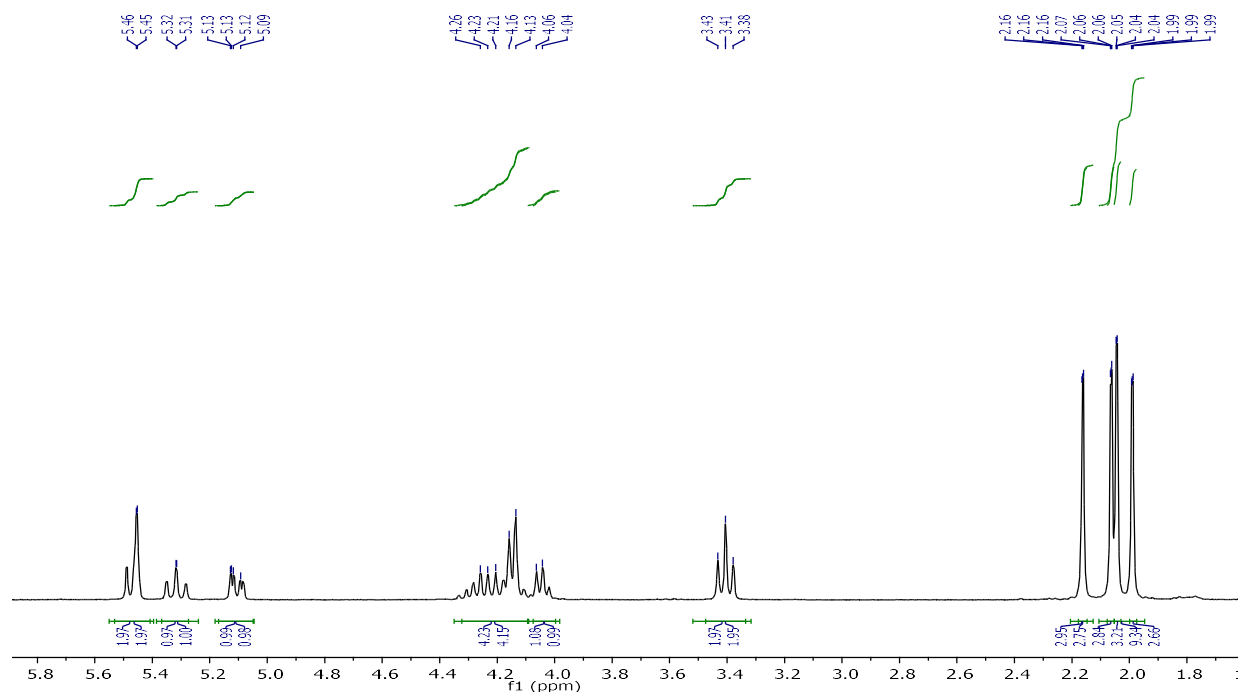

CDCl<sub>3</sub> 300 MHz

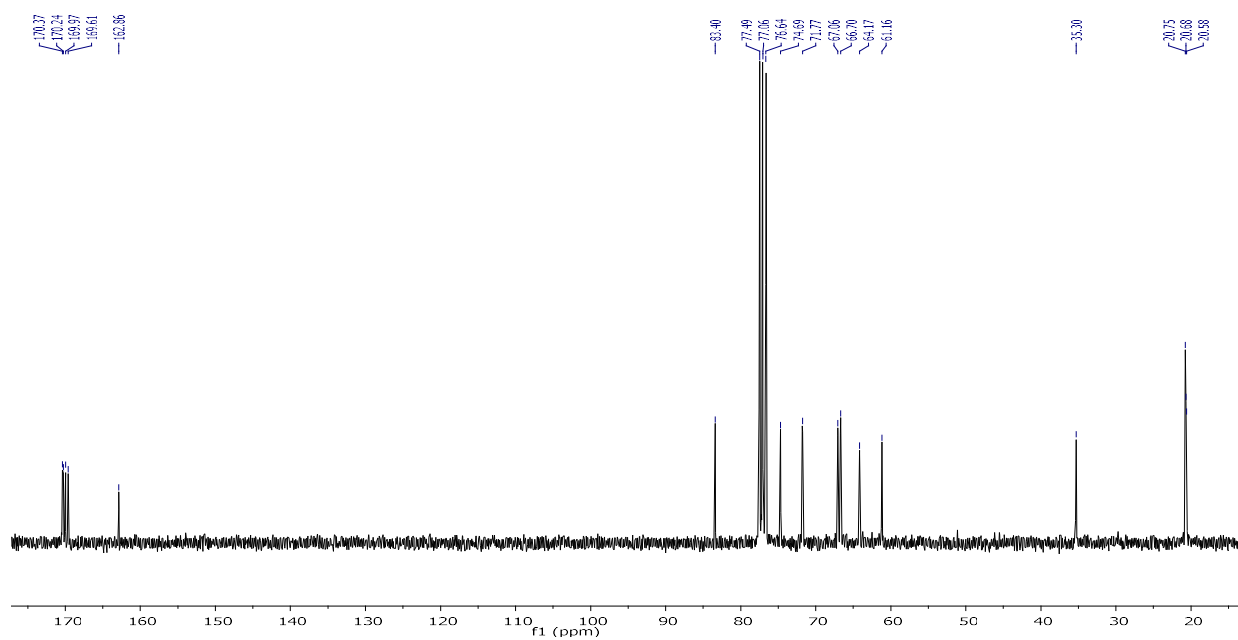

CDCl<sub>3</sub> 75 MHz

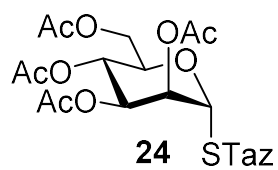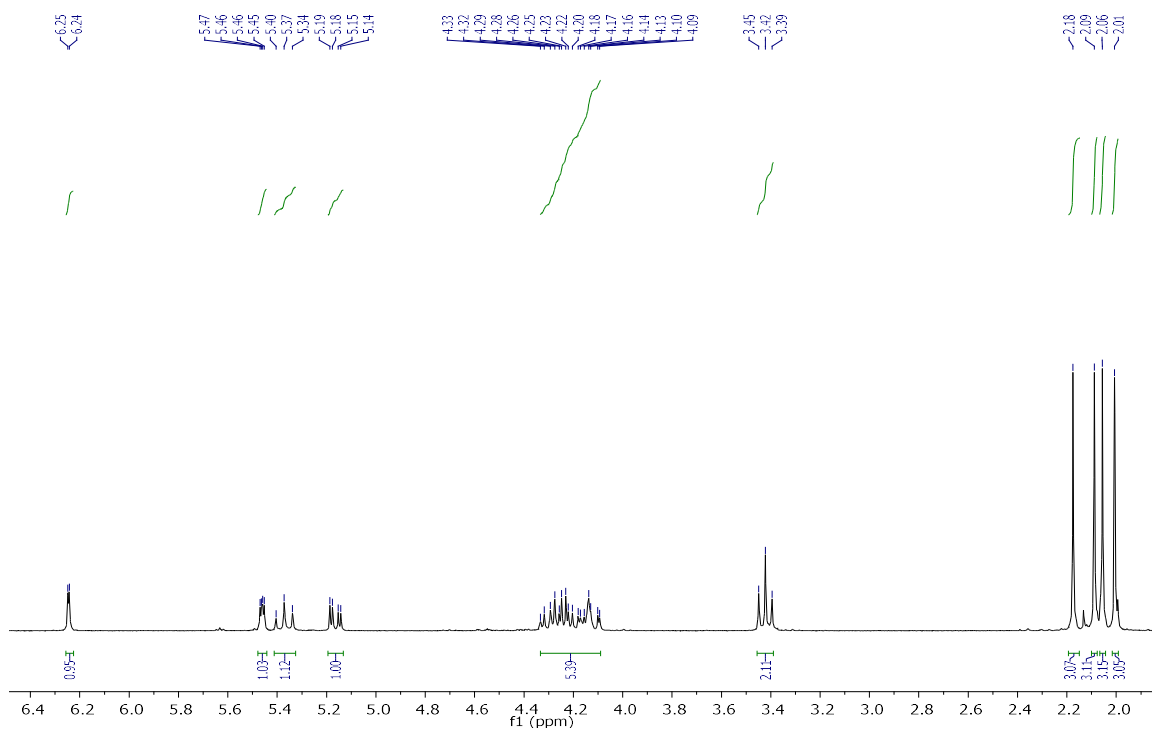

CDCl<sub>3</sub> 300 MHz

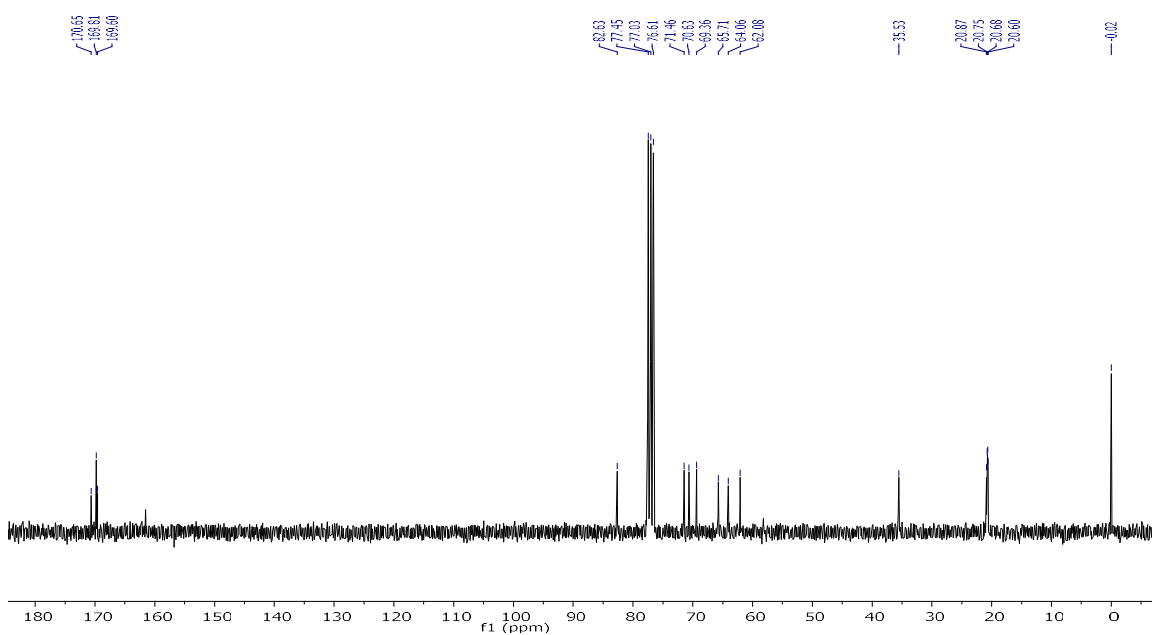

CDCl<sub>3</sub> 75 MHz
